# Supplementary material
Source: PubMed Central journal article supplement (PMC2846719)
Supplement: NIHMS172198-supplement-1_si_001.pdf [file NIHMS172198-supplement-1_si_001.pdf]

## Supporting Information

Thermochemistry and Molecular Structure of a Remarkable Agostic Interaction in  
a Heterobifunctional Ruthenium-Boron Complex

Brian L. Conley and Travis J. Williams\*

Donald P. and Katherine B. Loker Hydrocarbon Research Institute and  
Department of Chemistry, University of Southern California,  
Los Angeles, California, 90089-1661  
travisw@usc.edu

- I. General Procedures
- II. Experimental Details for New Compounds
- III. van't Hoff Analysis for Reversible Agostic Interaction
- IV. Rate Measurements and Thermochemical Analysis by  $^1\text{H}$  NMR Inversion  
Recovery/Magnetization Transfer
- V. Graphical  $^1\text{H}$  and  $^{13}\text{C}$  NMR Spectra for New Compounds
- VI. Oxidation of 1-(4-methoxyphenyl)ethanol
- VII. X-Ray Crystal Structure Solutions for **1**, **4**, and **7**

## I. General Procedures

All air and water sensitive procedures were carried out either in a Vacuum Atmosphere glove box under nitrogen (2-10 ppm O<sub>2</sub> for all manipulations) or using standard Schlenk techniques under nitrogen. Labeled NMR solvents were purchased from Cambridge Isotopes Labs. Acetonitrile-*d*<sub>3</sub> (CD<sub>3</sub>CN) and dichloromethane-*d*<sub>2</sub> (CD<sub>2</sub>Cl<sub>2</sub>) were dried over CaH<sub>2</sub>; benzene-*d*<sub>6</sub> (C<sub>6</sub>D<sub>6</sub>) was dried over sodium benzophenone ketyl; acetone-*d*<sub>6</sub> was stored over activated 4 Å molecular sieves and all were vacuum transferred before use. NMR spectra were obtained on a Varian Mercury 400 MHz, Varian 400MR 400 MHz, or VNMRS 600 MHz spectrometer. All chemical shifts are reported in units of ppm and referenced to the residual <sup>1</sup>H solvent. NMR spectra were taken in 8" J-Young tubes (Wilmad). For protically sensitive molecules, the tubes were shaken vigorously for several minutes with chlorotrimethylsilane in hexanes then warmed gently with a heat gun under vacuum. Di-μ-chlorobis[(p-cymene)chlororuthenium(II)], min. 98% was purchased from Strem Chemicals. Dimethylbromoborane was purchased from Sigma Aldrich. 2-Bromopyridine was purchased from TCI America. *n*-Butyllithium (1.6 M in hexane) was purchased from Alpha Aesar. Sodium dimethylbis(2-pyridyl)borate, Na[(CH<sub>3</sub>)<sub>2</sub>B(py)<sub>2</sub>] (**3**), was synthesized based on literature procedures.<sup>1</sup> Acetonitrile and acetonitrile-*d*<sub>3</sub> were refluxed over CaH<sub>2</sub> for 48 h, distilled, and then stored over 4 Å molecular sieves. Tetrahydrofuran was dried over sodium benzophenone ketyl. Silver trifluoromethane sulfonate was purchased from Sigma Aldrich or Strem Chemicals and used as received. Distilled water was purchased from Arrowhead and deoxygenated by purging with a stream of dry nitrogen. MALDI mass spectra were obtained on an Applied Biosystems Voyager spectrometer using the evaporated drop method on a coated 96 well plate. The matrix was anthracene. In a standard preparation, ~1 mg analyte and ~20 mg matrix were dissolved in a suitable solvent and spotted on the plate with a micro-pipetter. Standard C, H, N elemental analyses were performed by Desert Analytics Laboratory in Tucson, AZ, Galbraith Laboratories in Knoxville, TN, or University of Illinois, Urbana-Champaign. Fast atom bombardment (FAB) high-resolution mass spectra were collected at the University of California, Riverside Mass Spectrometry Facility and University of California, Los Angeles Molecular Instrumentation Center.

## II. Experimental Details for New Compounds

### Chlorocymene Ruthenium Complex 4:

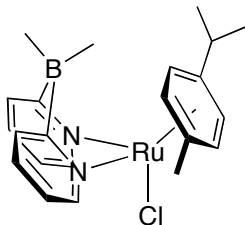

In the glovebox, di- $\mu$ -chlorobis[(*p*-cymene)chlororuthenium(II)] (**2**, 100.0 mg, 0.163 mmol) was suspended (partially soluble) in 10 mL acetonitrile.  $[\text{Na}(\text{CH}_3)_2\text{B}(\text{py})_2]$  (**3**, 71.9 mg, 0.326 mmol) in 10 mL acetonitrile was added dropwise and the solution was stirred for 0.5 h at room temperature under nitrogen. The orange solution was filtered over a celite/glass wool plug and then the solvent removed on a Schlenk line. The orange residue was treated with a minimal volume of benzene and quickly diluted with hexanes to generate an orange solid. The solution was decanted to yield **4** as a fine orange powder, 76.0 mg, 50% yield.

$^1\text{H}$  NMR (400 MHz in benzene- $d_6$  at 25 °C):  $\delta$  = 9.09 (dd, pyridyl 2H,  $J$  = 6.1 Hz), 7.92 (dd, pyridyl 2H,  $J$  = 7.5 Hz), 6.99 (dt, pyridyl 2H,  $J$  = 7.3 Hz), 6.46 (dt, pyridyl 2H,  $J$  = 6.6 Hz), 4.93 (d, cym 2H,  $J$  = 5.2 Hz), 4.61 (d, cym aromatic 2H,  $J$  = 4.8 Hz), 2.43 (septet, cym methane 1H,  $J$  = 7.1 Hz), 1.15 (s, cym methyl, 3H), 0.83 (d, cym isopropyl methyls 6H,  $J$  = 6.9 Hz), 0.75 (broad s,  $\text{CH}_3$ -B 3H), 0.59 (broad s,  $\text{CH}_3$ -B 3H).

$^1\text{H}$  NMR (400 MHz in acetone- $d_6$  at 25 °C):  $\delta$  = 9.01 (dd, pyridyl 2H,  $J$  = 6.1 Hz), 7.62 (dd, pyridyl 2H,  $J$  = 7.7 Hz), 7.46 (dt, pyridyl 2H,  $J$  = 8.0 Hz), 6.94 (dt, pyridyl 2H,  $J$  = 6.7 Hz), 5.57 (d, cym 2H,  $J$  = 6.0 Hz), 5.31 (d, cym aromatic 2H,  $J$  = 6.0 Hz), 2.79 (septet, cym  $\text{CHMe}_2$  1H,  $J$  = 7.0 Hz), 1.73 (s, cym methyl, 3H), 1.21 (d, cym isopropyl methyls 6H,  $J$  = 6.9 Hz), 0.09 (broad s, overlapping  $\text{CH}_3$ -B 6H).

$^1\text{H}$  NMR (400 MHz in acetonitrile- $d_3$  at 25 °C):  $\delta$  = 9.01 (dd, pyridyl 2H,  $J$  = 6.2 Hz), 7.68 (dd, pyridyl 2H,  $J$  = 7.8 Hz), 7.50 (dt, pyridyl 2H,  $J$  = 7.5 Hz), 6.98 (dt, pyridyl 2H,  $J$  = 6.4 Hz), 5.50 (d, cym 2H,  $J$  = 6.3 Hz), 5.25 (d, cym aromatic 2H,  $J$  = 6.0 Hz), 2.73 (septet, cym methyl 1H,  $J$  = 7.2 Hz), 1.67 (s, cym methyl, 3H), 1.15 (d, cym isopropyl methyls 6H,  $J$  = 6.6 Hz), 0.05 (broad s,  $\text{CH}_3$ -B 6H).

$^{13}\text{C}\{^1\text{H}\}$  NMR (100 MHz in benzene- $d_6$  at 25 °C):  $\delta$  = 155.45 (pyridyl), 134.17 (pyridyl), 130.15 (pyridyl), 119.70 (pyridyl), 104.75 (ipso cymene), 100.71 (ipso cymene), 86.54 (cym aromatic), 83.78 (cym aromatic), 30.25, 22.77, 17.09. Carbon atoms connected to boron were not observed directly due to broadening.

$^{13}\text{C}$  shifts from HMQC (in acetonitrile- $d_3$  at 25 °C)  $\delta$  = 158.26 (pyridyl), 135.80 (pyridyl), 130.72 (pyridyl), 121.67 (pyridyl), 87.10 (cym aromatic), 85.50 (cym aromatic), 31.04 (cym methine), 17.50 (cym methyl), 22.90 (cym i-Pr methyl), 16.20 (boron bound methyls).

FAB HRMS for  $[\text{M}-\text{Cl}]^+$ : calc'd 433.1389 g/mol, found 433.1385 g/mol.

Elemental analysis: calc'd C: 56.48, H: 6.03, N: 5.99; found C: 55.93, H: 5.81, N: 6.36.

Infrared spectrum ( $\text{cm}^{-1}$ ):  $\nu$  = 2925 (s), 1592 (s), 1460 (s), 1384 (vs), 1287 (m), 996 (m), 865 (m), 759 (s), 750 (s).

Single crystal X-ray data for **4** are tabulated in section VII. CCDC 738030 contains the supplementary crystallographic data for this paper. These data can be obtained free of charge from The Cambridge Crystallographic Data Centre via [www.ccdc.cam.ac.uk/data\\_request/cif](http://www.ccdc.cam.ac.uk/data_request/cif)

Cymene Ruthenium Triflate **5**:

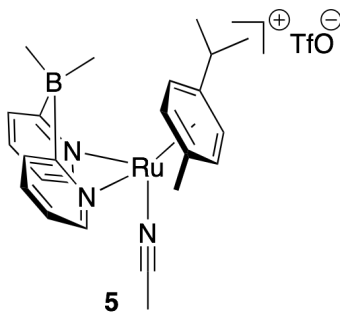

In the glovebox **4** (5.0 mg, 0.011 mmol) was shaken with silver triflate (3.0 mg, 0.012 mmol) in 0.5 mL CD<sub>3</sub>CN in an 8" J-Young NMR tube that had been treated with Me<sub>3</sub>SiCl and dried (see General Procedures). NMR data were taken within 5 minutes before significant acetonitrile/cymene substitution occurred.

<sup>1</sup>H NMR (400 MHz in acetonitrile-*d*<sub>3</sub> at 25 °C): δ = 8.81 (dd, pyridyl 2H, *J* = 6.0 Hz), 7.81 (dd, pyridyl 2H, *J* = 8.0 Hz), 7.67 (dt, pyridyl 2H, *J* = 7.2 Hz), 6.53 (dt, pyridyl 2H, *J* = 6.5 Hz), 5.83 (d, cym 2H, *J* = 6.5 Hz), 5.57 (d, cym aromatic 2H, *J* = 6.5 Hz), 2.74 (septet, CHMe<sub>2</sub> 1H, *J* = 7.0 Hz), 1.72 (s, cym methyl, 3H), 1.17 (d, cym isopropyl methyls 6H, *J* = 6.9 Hz), 0.09 (broad s, CH<sub>3</sub>-B 3H), 0.04 (broad s, CH<sub>3</sub>-B 3H).

<sup>19</sup>F NMR (376 MHz in acetonitrile-*d*<sub>3</sub> at 25 °C): δ = -78. Only one <sup>19</sup>F signal is observed through the duration of this transformation, which is consistent with an outer-sphere triflate.

Tetrakisacetonitrile Ruthenium Triflate **6** and Agostic Complex **7** (equilibrating mixture):

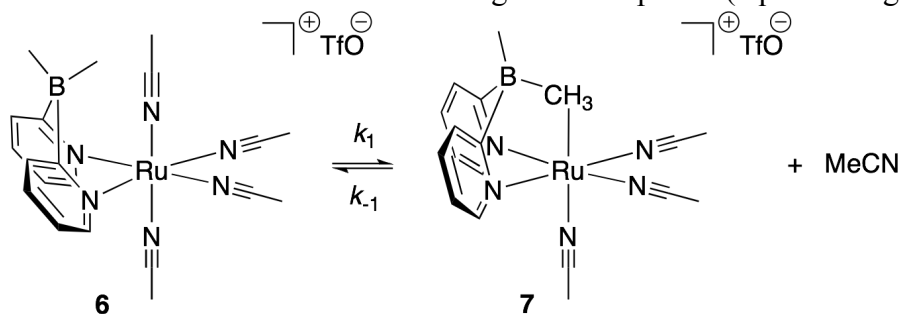

The J-Young tube containing **5** under nitrogen was heated in the NMR probe or a regulated silicone oil bath at 75 °C for ca. 5 minutes. This produces a solution of free *p*-cymene, **6** and **7**. Compound **6** is the predominant form at 75 °C (ca. 2:1 ratio). Data are determined from analysis of the equilibrated mixture based on peak integrations and several temperatures.

$^1\text{H}$  NMR of **6** (400 MHz in acetonitrile- $d_3$  at 25 °C):  $\delta$  = 8.66 (dd, pyridyl 2H,  $J$  = 7.0 Hz), 7.67 (broad d, pyridyl 2H,  $J$  = 7.6 Hz), 7.48 (dt, pyridyl 2H,  $J$  = 7.6 Hz), 6.92 (dt, pyridyl 2H,  $J$  = 6.7 Hz), 0.08 and 0.07 (overlapping broad s,  $\text{CH}_3$ -B 6H).

$^1\text{H}$  NMR of **7** (400 MHz in acetonitrile- $d_3$  at 25 °C): 8.55 (dd, pyridyl 2H,  $J$  = 5.7 Hz), 7.60 (dt, pyridyl 2H,  $J$  = 8.0 Hz), 7.44 (broad d, pyridyl 2H,  $J$  = 7.6 Hz), 7.06 (distorted t – overlapping free cymene signal, pyridyl 2H,  $J$  = 6.7 Hz), 0.18 (broad s,  $\text{CH}_3$ -B 3H), -5.13 (broad s, Ru- $\text{CH}_3$ -B agostic 3H).

Selected  $^{13}\text{C}$  shifts from HMQC in acetonitrile- $d_3$ :  $\delta$  = -2.61 ( $\text{CH}_3$ -B agostic, **7**), 8.1 ( $\text{CH}_3$ -B unbound, **7**), 19.1 ( $\text{CH}_3$ -B unbound, **6**), 196.0 and 197.1 (*ipso* pyridyls, **6**), 193.4 and 191.6 (*ipso* pyridyls, **7**), 119.8 (equatorial  $\text{CH}_3\text{CN}$ , **7**), 122.0 (equatorial  $\text{CH}_3\text{CN}$ , **6**). Aromatic region was frustrated by signals from **6**, **7**, **1**, and free cymene.

$^{19}\text{F}$  NMR (376 MHz in acetonitrile- $d_3$  at 25 °C):  $\delta$  = -78. Only one  $^{19}\text{F}$  signal is observed through the duration of this transformation, which is consistent with an outer-sphere triflate.

Single crystal X-ray data for **7** are tabulated in section VII. CCDC 755444 contains the supplementary crystallographic data for this paper. These data can be obtained free of charge from The Cambridge Crystallographic Data Centre via [www.ccdc.cam.ac.uk/data\\_request/cif](http://www.ccdc.cam.ac.uk/data_request/cif)

Determination of ligand environment of **6** and **7** in acetonitrile:

Because **6** and **7** are in situ-prepared compounds synthesized in acetonitrile- $d_3$ , acetonitrile ligands could not be determined in neat deuterated solvent. Further, the  $^2\text{H}$  NMR signals were too broad to be useful. This disabled determination of the number of acetonitrile ligands in **6** and **7**, particularly whether the apical site in **6** was occupied by acetonitrile, which would have to be displaced in order for the agostic methyl to bridge to form. To probe the coordination sphere, we synthesized the compounds as above but substituted neat acetonitrile- $d_3$  for a 1:1 mixture of acetonitrile- $d_3$  and acetonitrile- $h_3$ , reasoning that all bound acetonitrile would be visible by  $^1\text{H}$  NMR, be exactly 50% acetonitrile- $d_3$  acetonitrile- $h_3$ , and integrate appropriately to other proton peaks in their respective compounds by  $^1\text{H}$  NMR. Spectra were taken using a Wet1D sequence to suppress acetonitrile- $h_3$  and examined in the region immediately downfield of free acetonitrile. Indeed, this analysis at 25 °C was diagnostic. Ligand peaks for **1** were identified at 2.56 and 2.44 ppm. We chose to execute this experiment on a sample of **6** + **7** that included a generous portion of **1** because **1** itself is a very useful integration standard because its *BMe* group has a similar T1 to *BMe* groups in **6** and **7**. In addition, four other major resonances were seen in the region: the peaks at 2.34 and 2.48 ppm integrate 1:1 with respect to each other and 1:2 with respect to the free dimethyl borate signal at 0.07 ppm for compound **6**. In a fully acetonitrile- $h_3$  molecule they would integrate 1:1 with the dimethyl signal. This establishes the presence of only 2 inequivalent ligands and indicates that the apical and axial bound acetonitriles are the same. Further, we believe that in a molecule inert to dimetallapyrimidine ring flipping, these signals would be resolved. Thus, these data suggest the ligand is ring flipping rapidly as is observed in an analogous platinum system.<sup>2</sup> In the same spectrum we see smaller peaks at 2.59 and 2.50 ppm that integrate 1:2 with respect to each other. The taller peak is assigned to the equatorial (6H) acetonitriles and integrates 1:1 with the unbound methyl in compound **7**. In a fully ring acetonitrile- $h_3$  molecule these would integrate 2:1 with this signal.

To further corroborate our assignments, we heated the NMR tube to 75 °C to observe the relative ratios of the peaks at 2.34, 2.48 (**6**), and 2.59, 2.50 (**7**) ppm. In accordance with our kinetic analyses (*vide infra*), the ligand peaks assigned to **7** grow in as those for **6** decrease (see *Figure S1*).

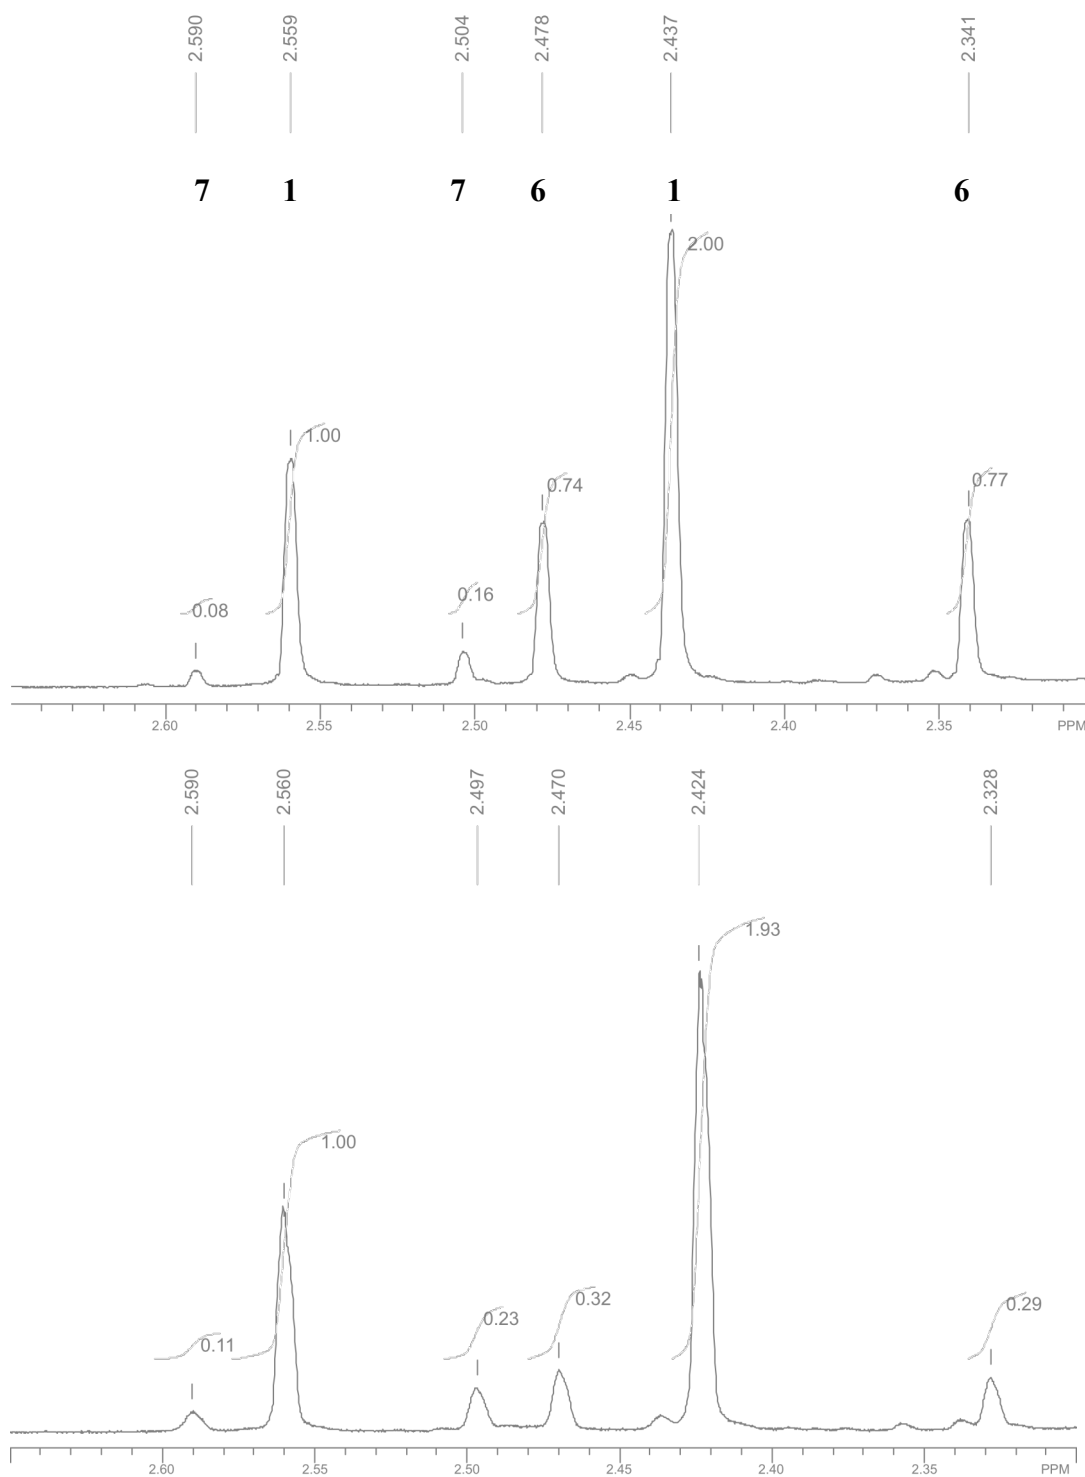

**Figure S1.** Bound Acetonitrile region of 400 MHz <sup>1</sup>H NMR Spectrum for an Equilibrating Mixture of **6** and **7** in 1:1 acetonitrile-*d*<sub>3</sub>:acetonitrile-*h*<sub>3</sub>. *Top:* at 25 °C. *Bottom:* at 75 °C. The relative increase of the peaks at  $\delta = 2.56$  and 2.44 at higher temperature is due to hydrolysis (to **1**) by adventitious water in the NMR tube.



Trisacetonitrile  $\mu$ -Hydroxide Ruthenium Triflate **1**:

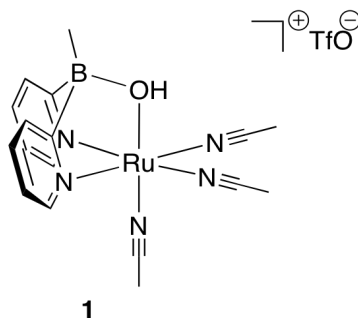

In the glovebox, **4** (150.0 mg, 0.321 mmol) was dissolved in 10 mL acetonitrile in a 30 mL Straus flask that had been washed with distilled water and acetone and dried only briefly (ca. 10 minutes) on the Schlenk line, presumably leaving the glass well hydrated. To this solution was added AgOTf (86.5 mg, 0.337 mmol, 1.05 eq) in 5 mL acetonitrile. The solution was heated for 4 h at 75 °C, cooled to room temperature, then filtered over celite/glass wool in the glovebox. Solvent was removed and the residue dried overnight on the Schlenk line. The residue was re-dissolved in a minimum volume of dichloromethane and the resulting solution was diluted with hexanes, which resulted in the precipitation of a pale yellow solid. The solution was decanted and residual solvent was removed on the Schlenk line for several hours, yielding 115.1 mg (63% yield) of **1** as a light yellow material. This compound is air sensitive in solution and as a solid, yielding green paramagnetic (by  $^1\text{H}$  NMR) material upon overnight exposure to the atmosphere.

$^1\text{H}$  NMR (400 MHz in dichloromethane- $d_2$  at 25 °C):  $\delta$  = 8.60 (dd, pyridyl 2H,  $J$  = 5.3 Hz), 7.56 (dt, pyridyl 2H,  $J$  = 7.8 Hz), 7.44 (dd, pyridyl 2H,  $J$  = 7.6 Hz), 7.05 (dt, pyridyl 2H,  $J$  = 6.6 Hz), 2.65 (s, axial  $\text{CH}_3\text{CN}$ , 3H), 2.49 (s, equatorial  $\text{CH}_3\text{CN}$ , 6H), 0.69 (s, -OH, 1H), 0.35 (s,  $\text{CH}_3\text{-B}$  3H).

$^1\text{H}$  NMR (400 MHz in acetonitrile- $d_3$  at 25 °C):  $\delta$  = 8.66 (dd, pyridyl 2H,  $J$  = 5.6 Hz), 7.59 (dt, pyridyl 2H,  $J$  = 7.8 Hz), 7.41 (dd, pyridyl 2H,  $J$  = 7.4 Hz), 7.07 (dt, pyridyl 2H,  $J$  = 6.5 Hz), 2.56 (s, axial  $\text{CH}_3\text{CN}$ , 3H), 2.44 (s, equatorial  $\text{CH}_3\text{CN}$ , 6H), 0.29 (s,  $\text{CH}_3\text{-B}$  3H,  $J_{\text{HC}}$  = 19.8 Hz).

$^{13}\text{C}\{^1\text{H}\}$  NMR (100 MHz in dichloromethane- $d_2$  at 25 °C):  $\delta$  = 151.49 (pyridyl), 133.45 (pyridyl), 124.94 (pyridyl), 124.25 (axial  $\text{CH}_3\text{CN}$ ), 123.78 (equatorial  $\text{CH}_3\text{CN}$ ), 120.52 (pyridyl), 5.99 (axial  $\text{CH}_3\text{CN}$ ), 5.54 (equatorial  $\text{CH}_3\text{CN}$ ). Carbon atoms connected to boron were not observed directly due to broadening.

Selected  $^{13}\text{C}$  shift from HMQC in acetonitrile- $d_3$ :  $\delta$  = 3.32 ( $\text{CH}_3\text{-B}$ ).

FAB HRMS for  $[\text{M-OTf}]^+$ : calc'd 424.0883 g/mol, found 424.0863 g/mol. Elemental analysis: calc'd C: 37.77, H: 3.70, N: 12.24; found C: 37.53, H: 3.53, N: 12.01.

Infrared spectrum ( $\text{cm}^{-1}$ ):  $\nu$  = 3439 (m), 2272 (m), 1457 (m), 1428 (m), 1265 (vs, triflate), 1225 (s), 1156 (vs), 1031 (vs, triflate), 772 (m), 637 (vs, triflate).

Single crystal X-ray data for **1** are tabulated in section VII. CCDC 738031 contains the supplementary crystallographic data for this paper. These data can be obtained free of charge from The Cambridge Crystallographic Data Centre via [www.ccdc.cam.ac.uk/data\\_request/cif](http://www.ccdc.cam.ac.uk/data_request/cif)

### III. van't Hoff Data for Reversible Agostic Interaction

Measurement of  $K_{eq}$  was conducted by integrating methyl peaks downfield of 0 ppm in an equilibrating mixture of **6** and **7** (generated in situ as described above). Probe temperature was cycled from 20 °C to 60 °C by 10 °C increments and then back down in the same manner to collect two data points for each temperature. The temperature was calibrated using shift difference measurements in methanol and ethylene glycol standards. Three measurements were taken at each value and the temperature reported as the average. Error in  $\Delta H$  and  $\Delta S$  were calculated by linear regression analysis using Kaleidagraph software.

**Table S1.**  $K_{eq}$  Measurement and van't Hoff Analysis for B-CH<sub>3</sub> Agostic Interaction Formation (Compounds **6** and **7**).  $\Delta H = 5.5(2)$  kcal/mol and  $\Delta S = 20.1(5)$  eu.

| Run | Temp (°C) | $K_{eq}$ (M) |
|-----|-----------|--------------|
| 1   | 21.0(2)   | 2.15         |
| 2   | 21.0(2)   | 2.46         |
| 1   | 31.1(2)   | 3.06         |
| 2   | 31.1(2)   | 3.06         |
| 1   | 40.7(2)   | 3.93         |
| 2   | 40.7(2)   | 3.93         |
| 1   | 49.9(2)   | 5.27         |
| 2   | 49.9(2)   | 5.57         |
| 1   | 59.1(2)   | 6.37         |
| 2   | 59.1(2)   | 6.43         |

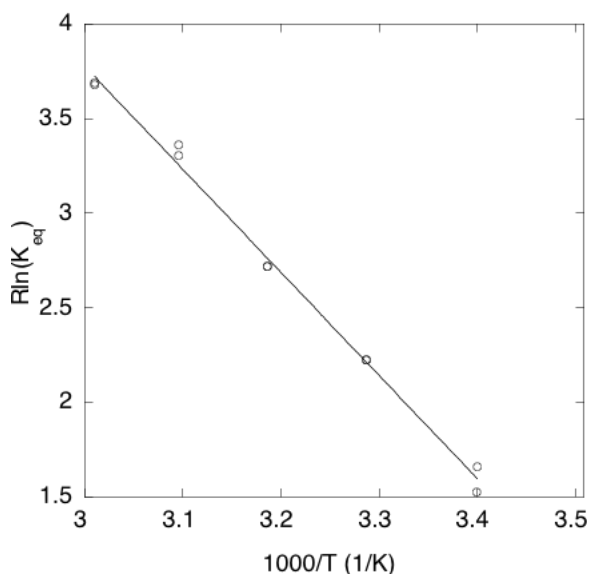

Please note that  $K_{eq}$  has units of M;  $K_{eq} = [7][MeCN][6]^{-1}$ . For comparative purposes, **6**: **7** = 1: 1 at 90 °C even though  $K_{eq}$  (90 °C) = 19(1) M because  $[MeCN] = 19$  M.

#### IV. Rate Measurements and Thermochemical Analysis by $^1\text{H}$ NMR Inversion Recovery/Magnetization Transfer

In order to obtain rate constants and activation parameters for the chemical exchange of methyl groups in compounds **6** and **7**, an *in situ* equilibrium was set up in a sealed J. Young NMR tube as described above. A soft-pulse inversion recovery sequence was fashioned by calibrating VNMRJ's built-in Presat sequence to match a known protocol used for intramolecular isomerization applications.<sup>3</sup> The methyl peak at -5.15 ppm (bridging methyl in **7**, 3H) was selectively inverted with a calibrated soft pulse, which was determined by arraying the soft pulse width. Next, the interpulse delay time arrayed (20-45 values ranging from ca. 0 to 10 sec.) and the experiment was initiated. The complementary +0.07 ppm methyl peak (unbound dimethyl borate in **6**, 6H) was integrated in each spectrum against an internal standard using VNMRJ processing software. Data were plotted as a function of the interpulse delay (**Figure S3**).

The raw data were fit to a two-site model<sup>4</sup> using the freeware processing program CIFIT.<sup>5</sup> Resulting values for equilibrium magnetization and exchange rate constants were recorded. A van't Hoff plot (**Figure S4**) derived from equilibrium magnetization values is in statistical agreement with the one above ( $\Delta H = 5.7(2)$  kcal/mol;  $\Delta S = 21.9(6)$  eu). Observed exchange rate constants were corrected to account for the apparent double integration of the 6H signal. Eyring plots to determine  $\Delta H^\ddagger$  and  $\Delta S^\ddagger$  were constructed from the measured rate constants (**Table S2** and **Table S3**).

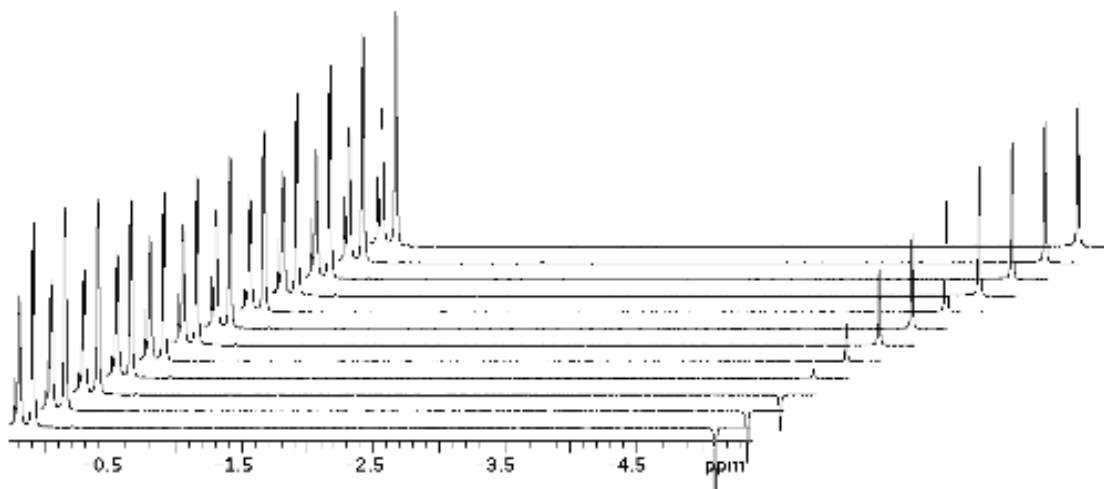

**Figure S2.** Demonstration Inversion-Recovery Data Collected on a Varian VNMRs 600 at 84.8 °C with interpulse delays arrayed between 50 ms to 7 s in this sampling.

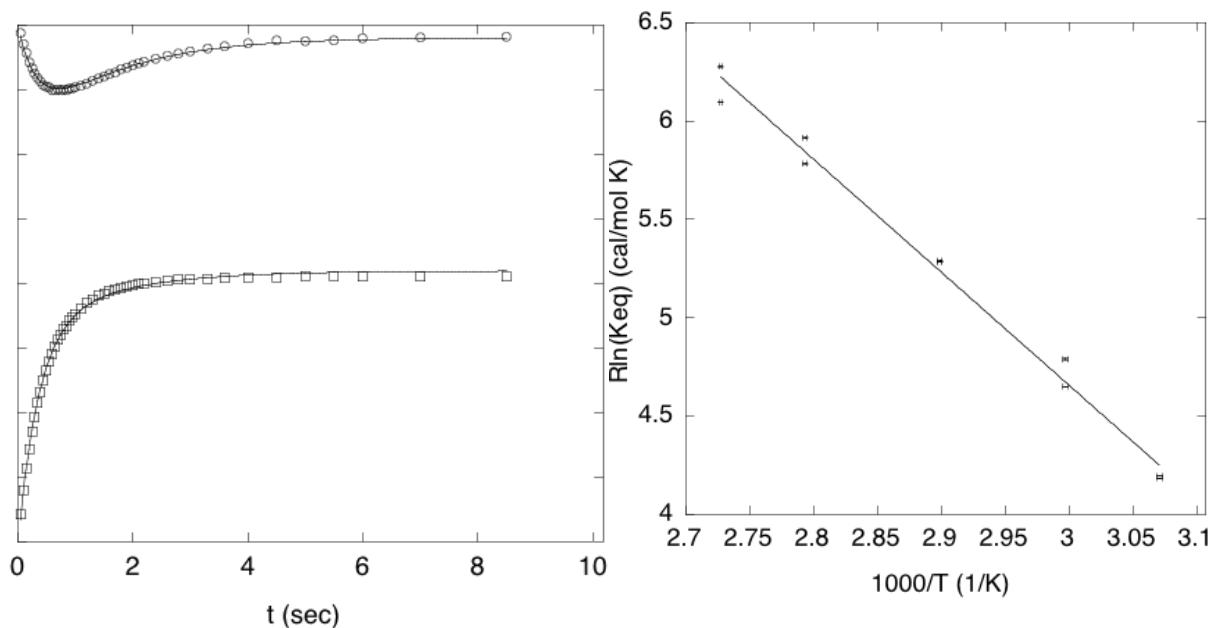

**Figure S3.** Representative Example of Processed Selective Inversion Recovery Magnetization Transfer Data. Integration of  $^1\text{H}$  NMR signals for unbound dimethyl boron (top, 0.07 ppm) and bridging methyl (bottom, -5.15 ppm) vs. delay time (d2, s) before detection. Sample temperature was 72 °C. Bridging methyl signal was irradiated with a calibrated pulse.

**Figure S4.** van't Hoff Plot Constructed from Fitted Values of Equilibrium Magnetization.  $\Delta H = 5.7(2)$  kcal/mol;  $\Delta S = 21.9(6)$  eu.

**Table S2.** Rate Constants ( $k_{-1 \text{ obs}}$ ,  $k_{-1}$ ) and Eyring Plot for the Conversion of **7** to **6**.

| T (°C)  | $k_{-1 \text{ obs}}$ (s <sup>-1</sup> ) | $k_{-1} \times 10^{-3}$ (M <sup>-1</sup> s <sup>-1</sup> ) |
|---------|-----------------------------------------|------------------------------------------------------------|
| 52.5(2) | 0.14(1)                                 | 7.2(3)                                                     |
| 60.5(2) | 0.23(1)                                 | 12.1(3)                                                    |
| 71.8(2) | 0.46(1)                                 | 24.2(7)                                                    |
| 84.8(2) | 0.98(4)                                 | 52(2)                                                      |
| 93.5(2) | 1.51(4)                                 | 80(2)                                                      |

Error bars represent quality of fit only.

$$\Delta H^\ddagger = 13.3(6) \text{ kcal/mol}$$

$$\Delta S^\ddagger = -27.5(43) \text{ eu.}^6$$

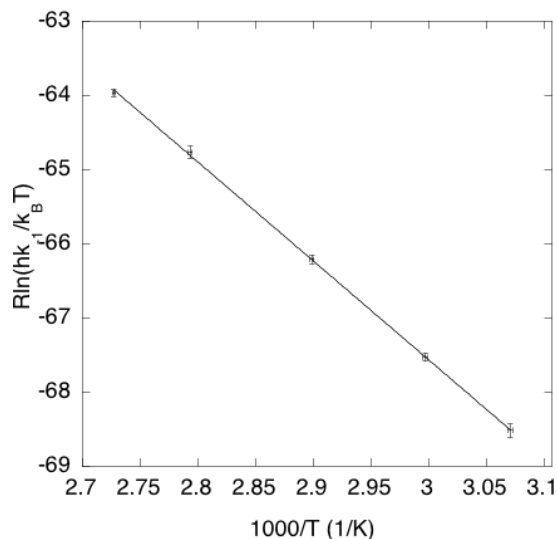

A second set of data was collected exactly as described above, but with inversion of the 6H signal at + 0.07 ppm (unbound dimethyl borate in **6**). In these data, NOE transfer of magnetization and/or unselective inversion are problematic because of the proximity of the signal for **7**'s free boron methyl at + 0.18 ppm. In such cases,  $\Delta\delta$  must be much larger than  $\tau_A^{-1}$  and  $\tau_B^{-1}$ , where  $\tau$  is the observed lifetime in the site.<sup>7</sup> In our case we have  $\Delta\delta = 44$  Hz;  $\tau_A^{-1} = 7 \text{ sec}^{-1}$ ; and  $\tau_B^{-1} = 12 \text{ sec}^{-1}$ . Thus, this experiment must be taken as an estimate. For completion's sake, the results follow.

**Table S3.** Estimated First Order Rate Constants ( $k_1$ ) and Eyring Plot for the Conversion of **6** to **7**.

| T (°C)  | $k_1$ (s <sup>-1</sup> ) |
|---------|--------------------------|
| 52.5(2) | 0.084(3)                 |
| 60.5(2) | 0.17(3)                  |
| 71.8(2) | 0.67(4)                  |
| 84.8(2) | 1.99(16)                 |
| 93.5(2) | 5.37(29)                 |

Error bars represent quality of fit only.

$\Delta H^\ddagger \sim 23 \text{ kcal/mol}$ ;  $\Delta S^\ddagger \sim 8 \text{ eu}$ .  $\Delta H^\ddagger$  appears to be an over estimate.

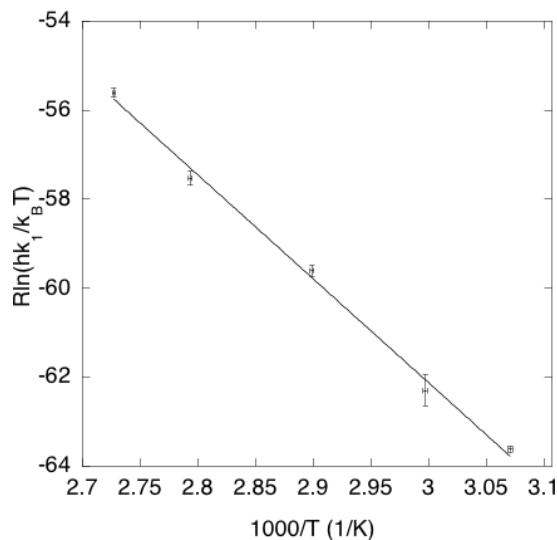**Table S4.** Dependence of  $k_{\text{obs}}$  (s<sup>-1</sup>) for Conversion of **7** to **6** on Acetonitrile Concentration (M).

| [acetonitrile] (M) | $k_{-1 \text{ obs}}$ ( $\text{s}^{-1}$ ) |
|--------------------|------------------------------------------|
| 18.9(1)            | 0.98(4)                                  |
| 15.1(5)            | 0.89(2)                                  |
| 13.2(8)            | 0.86(3)                                  |
| 9.5(10)            | 0.64(1)                                  |
| 6.6(12)            | 0.43(25)                                 |

Error bars represent quality of fit only.  
Acetonitrile concentration was reduced  
by adding aliquots of benzene- $d_6$ .

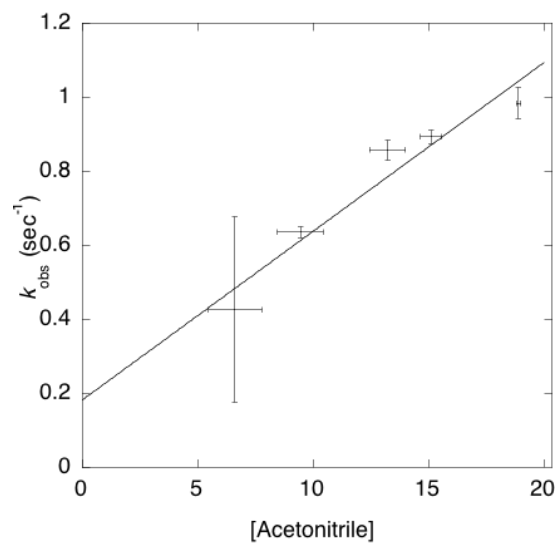

## V. Graphical $^1\text{H}$ and $^{13}\text{C}$ NMR Spectra for New Compounds

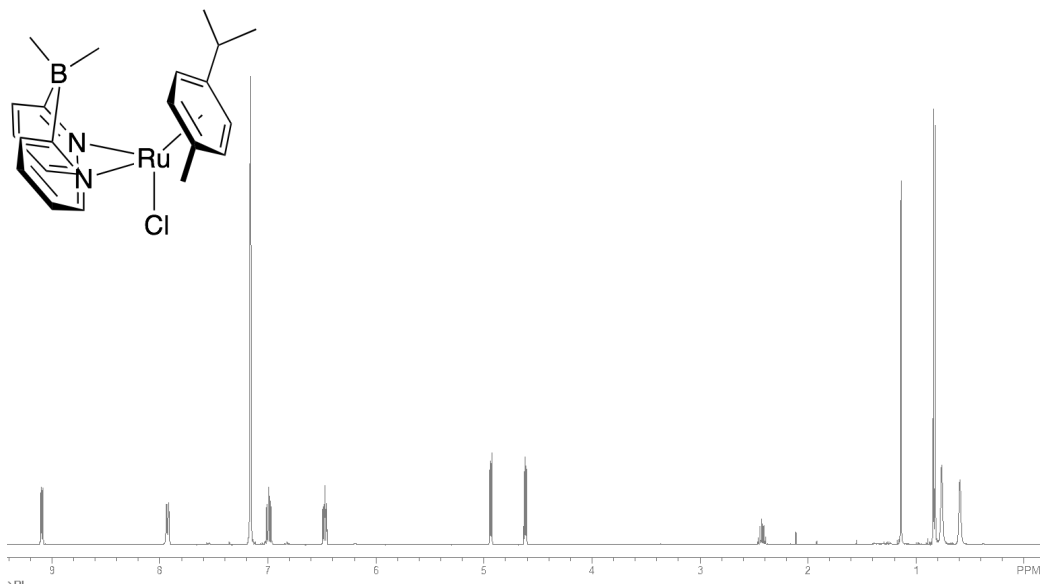

**Figure S5.** 400 MHz  $^1\text{H}$  NMR of Compound 4 in Benzene- $d_6$ .

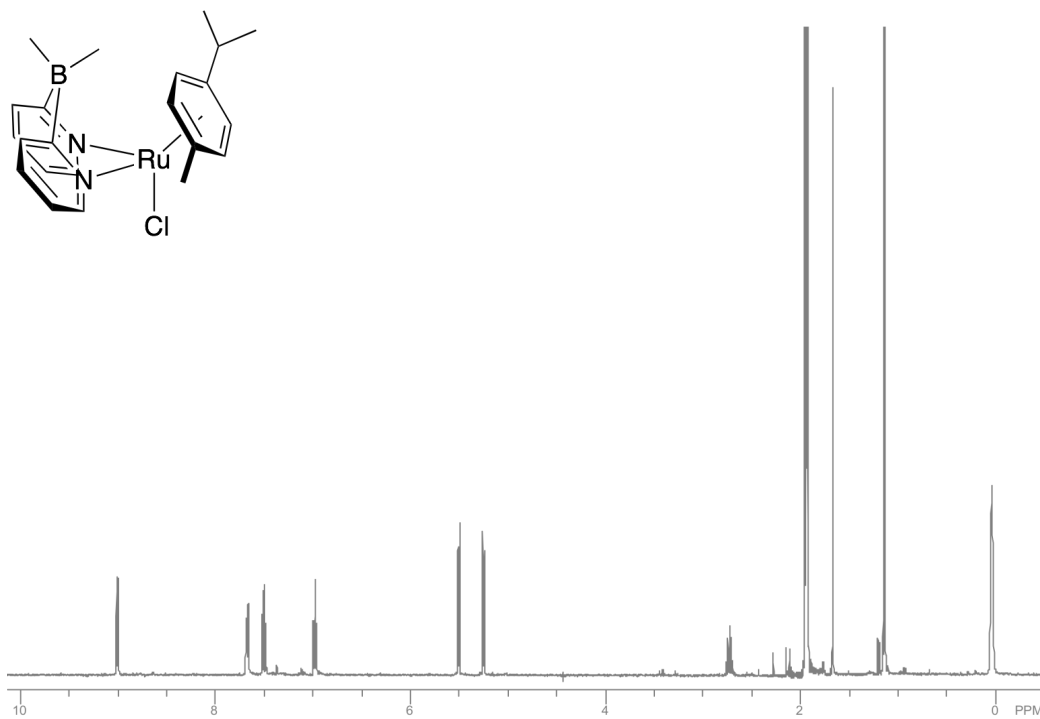

**Figure S6.** 400 MHz  $^1\text{H}$  NMR Compound 4 in Acetonitrile- $d_3$ .

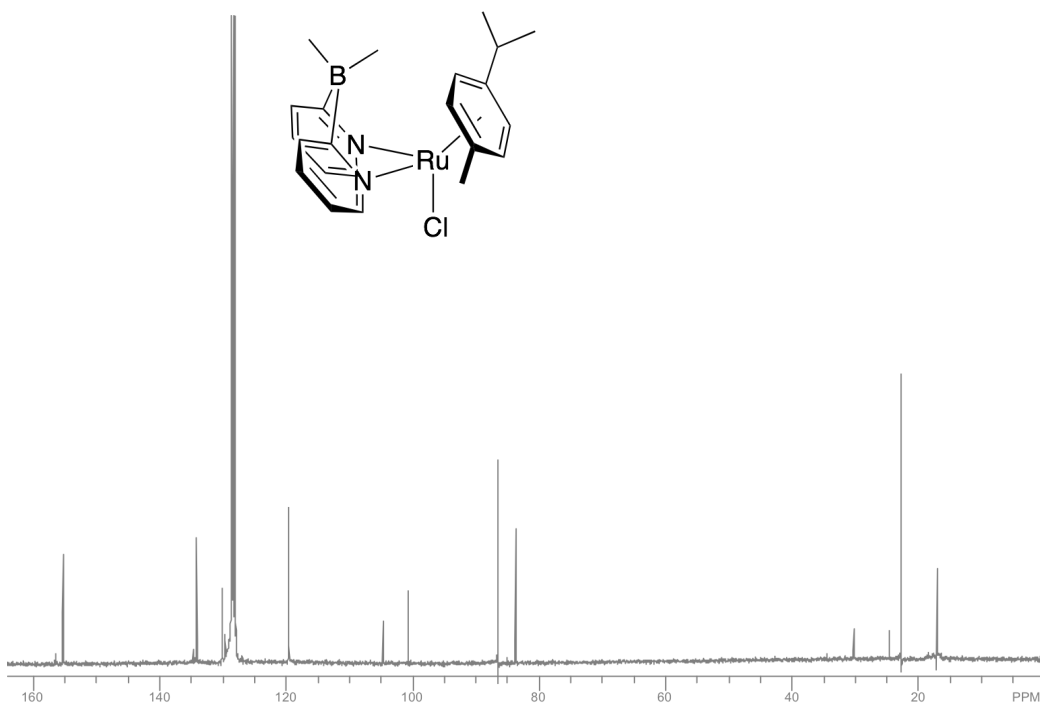

**Figure S7.** 100 MHz  $^{13}\text{C}\{^1\text{H}\}$  NMR of Compound **4** in Benzene- $d_6$ .

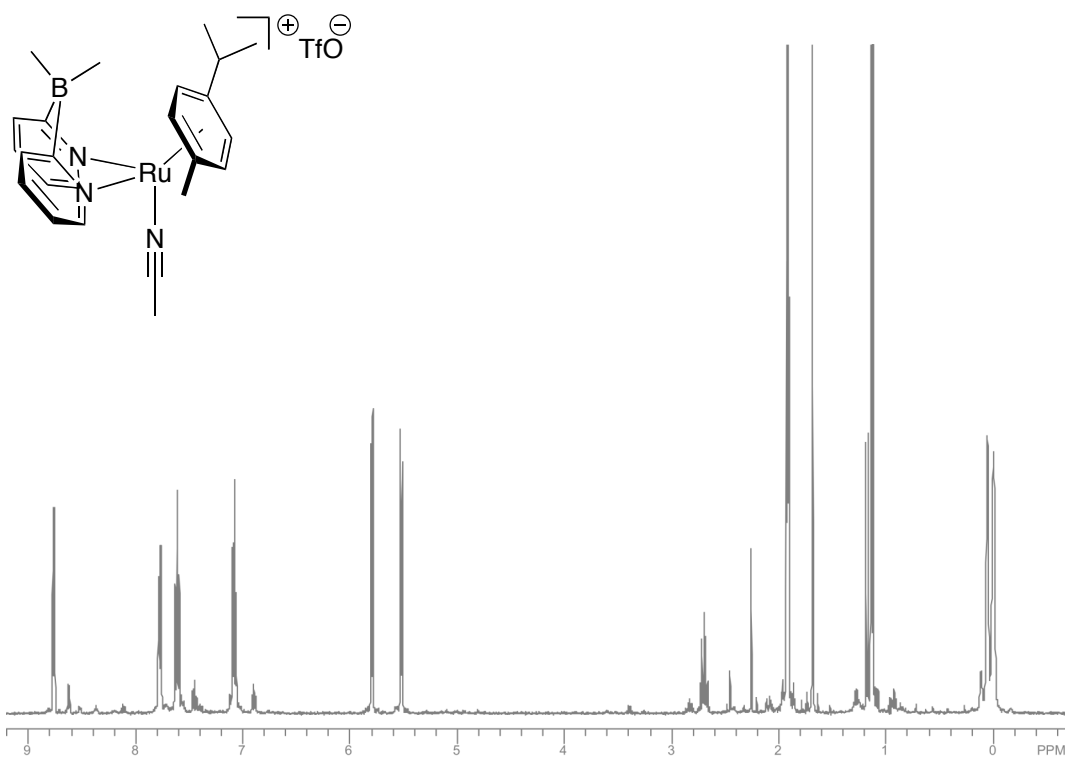

**Figure S8.** 400 MHz  $^1\text{H}$  NMR Compound **5** in situ in Acetonitrile- $d_3$ .



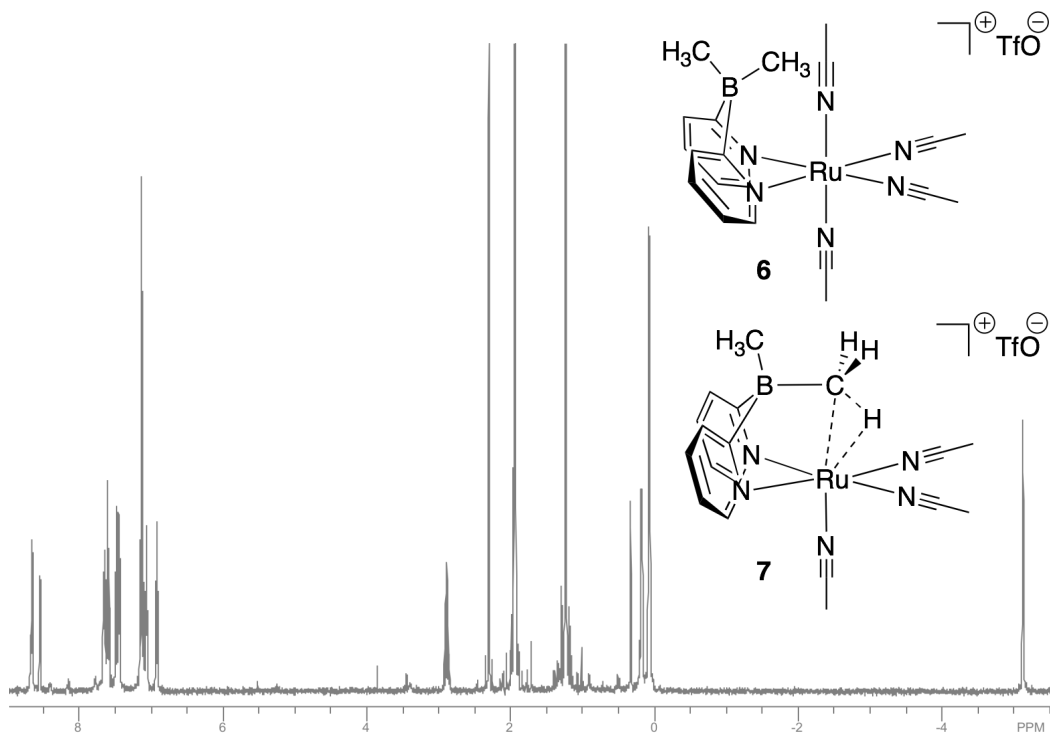

**Figure S9.** 400 MHz  $^1\text{H}$  NMR of **6** and **7** Equilibrating in Acetonitrile- $d_3$  at  $75\text{ }^\circ\text{C}$ . Upfield methyl peak at  $0.36\text{ ppm}$  is **1** resulting from residual  $\text{H}_2\text{O}$ . Methane is  $0.23\text{ ppm}$ .

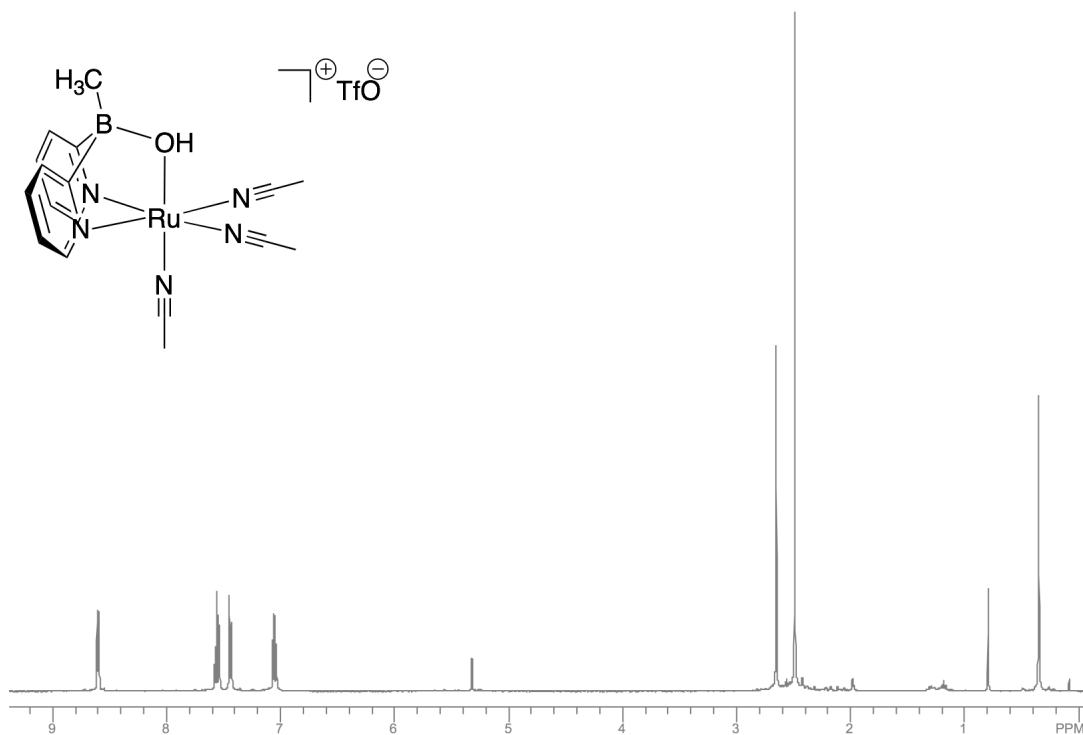

**Figure S10.** 400 MHz  $^1\text{H}$  NMR of Compound **1** in Dichloromethane- $d_2$ .

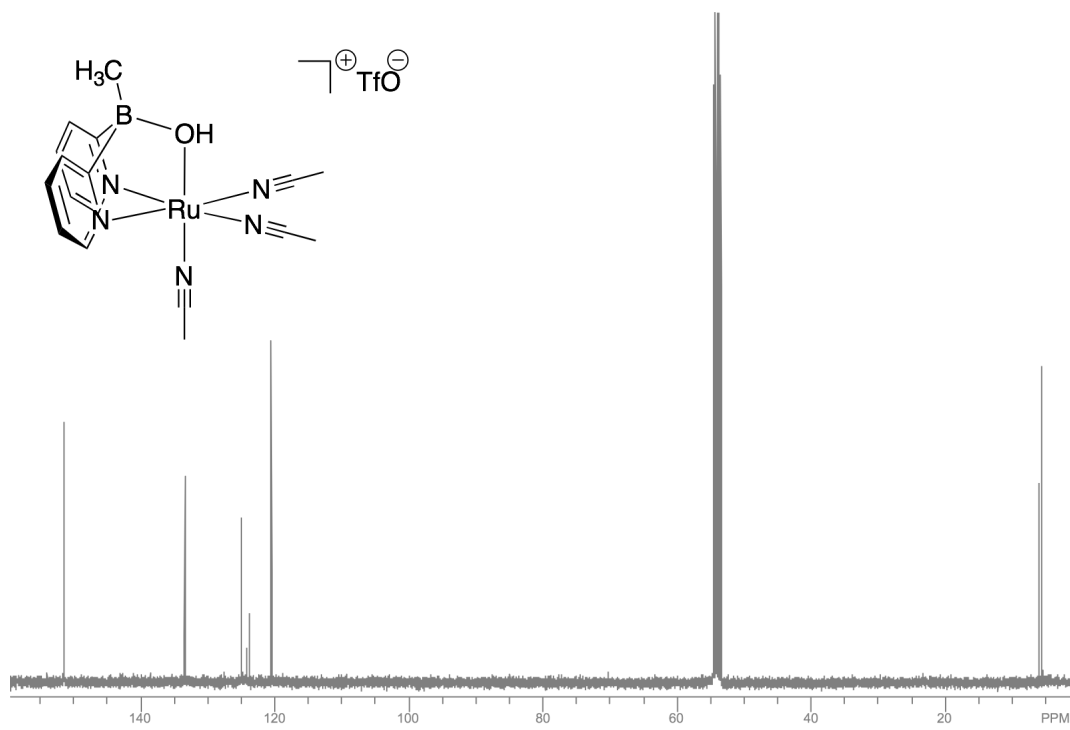

**Figure S11.** 100 MHz  $^{13}\text{C}\{\text{H}^1\}$  NMR spectrum for Compound 1 in Dichloromethane- $d_2$ .

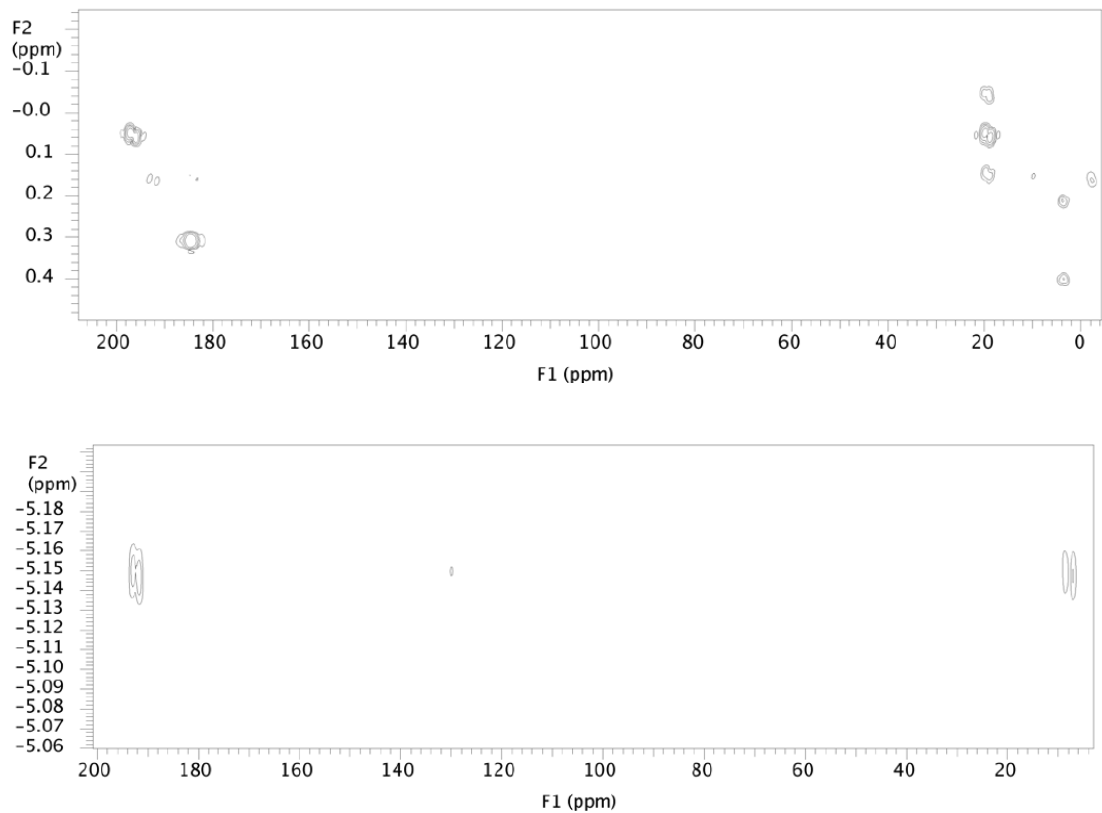

**Figure S12.** Methyl Region of  $^1\text{H}$ - $^{13}\text{C}$  HMBC for **6** and **7** Equilibrating in Acetonitrile- $d_3$  at 25 °C *Top*: showing no interaction of unbound methyl groups with acetonitrile ligands *Bottom*: showing the interaction of the agostic methyl in **7** with bound acetonitrile.

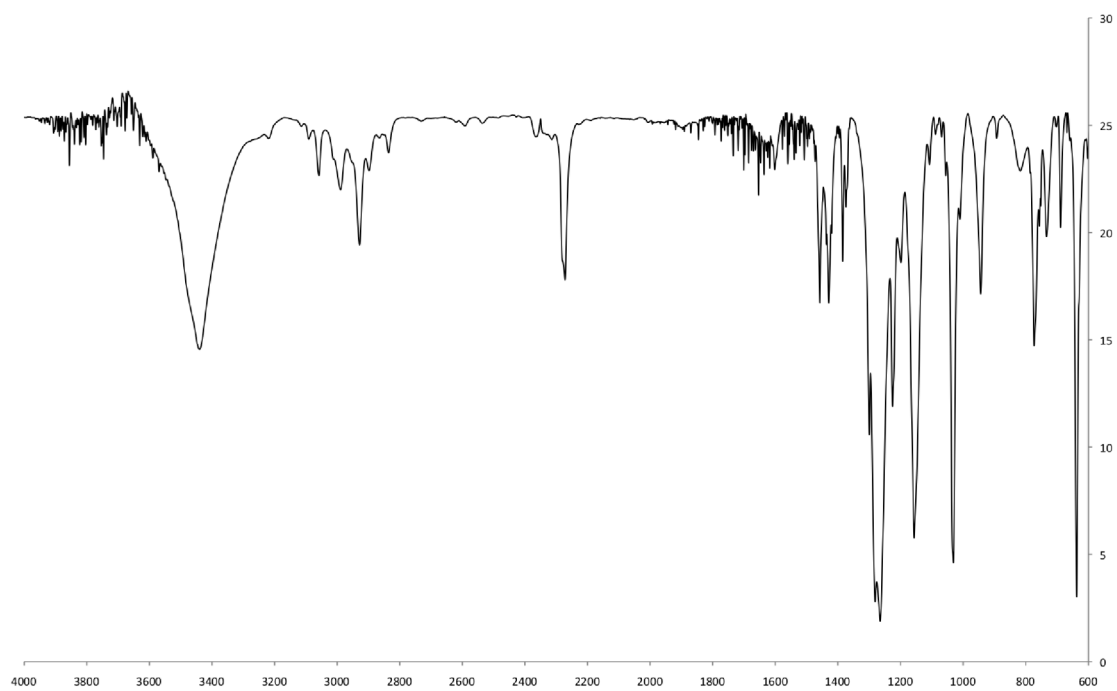

**Figure S13.** Infrared Spectrum of **1** (KBr pellet).

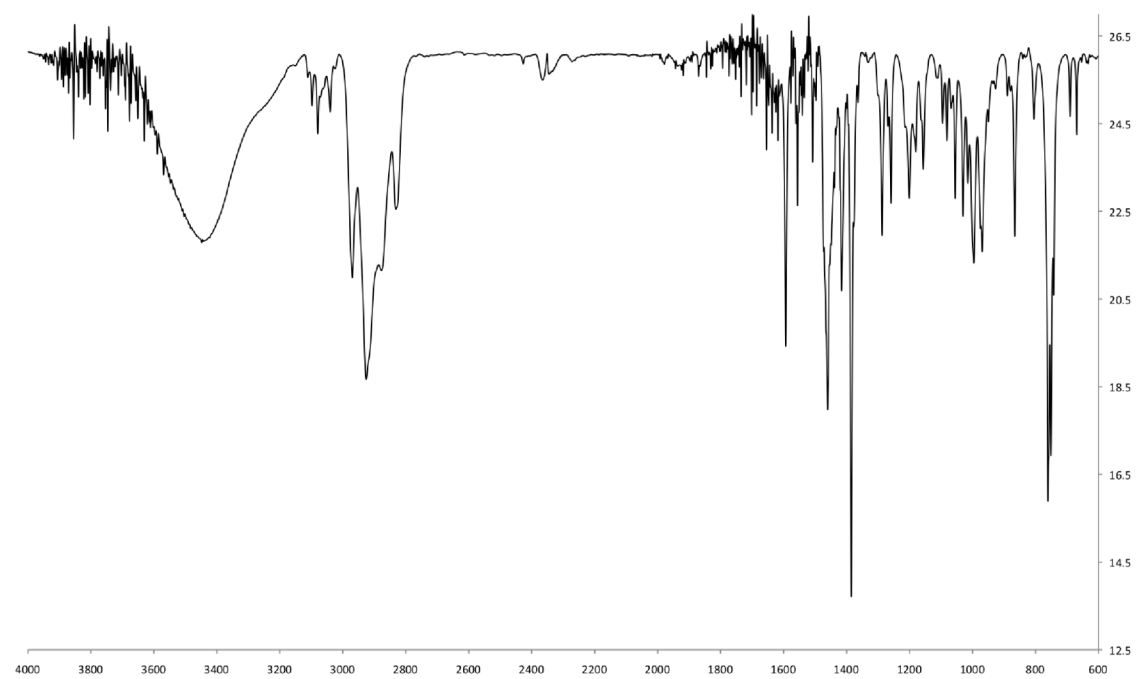

**Figure S14.** Infrared Spectrum of **4** (KBr pellet).

## VI. Oxidation of 1-(4-methoxyphenyl)ethanol with Compound 1

In the glovebox, 1.2 mg **1** (2.1 mmol, 3.3 mol%) was dissolved in 0.70 mL acetone-*d*<sub>6</sub> with 10.0  $\mu$ L (71.0 mmol) 1-(4-methoxyphenyl)ethanol and 1.2 mg potassium tert-butoxide (12.6 mmol, 19.8 mol %) in a J. Young NMR tube under nitrogen atmosphere. The tube was heated in a regulated oil-bath at 100 °C for 72 h. Conversion and yield were calculated based on the integration of the *t*-butoxide methyl peaks to the aromatic resonances.

## VII. Crystal Structure Data

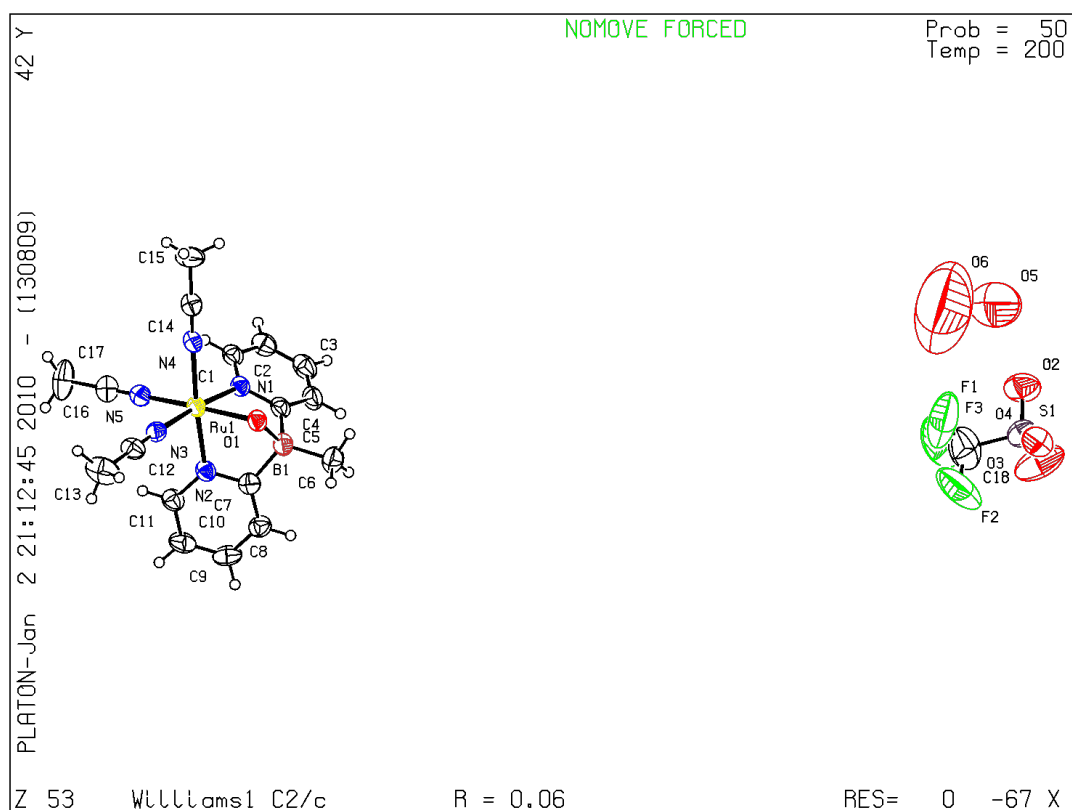

**Figure S15.** ORTEP diagram of complex **1**. Ellipsoids are drawn at the 50% probability level.

Yellow needles of compound **1** were grown by slow diffusion of diethyl ether into a concentrated, cooled (-40 °C) acetonitrile solution. Diffraction data were collected at 200(2) K on a SMART APEX CCD platform diffractometer with graphite fine-focused monochromatic Mo-K $\alpha$  radiation ( $\lambda = 0.71073 \text{ \AA}$ ). The cell parameters for (C<sub>18</sub>H<sub>20</sub>BF<sub>3</sub>N<sub>5</sub>O<sub>6</sub>RuS) were obtained from the least-squares refinement of the spots (from 60 collected frames) using the SMART program on a single crystal sample measuring 0.48 x 0.12 x 0.10 mm<sup>3</sup>. A hemisphere of data were collected (10 s/frame scan time for a

sphere of diffraction data) up to a resolution of 0.77 Å and the intensity data were processed using the “Saint Plus” program to yield the reflection data file. All calculations for the structure determination were carried out using the SHELXTL package (version 6.14).<sup>8</sup> Initial position of the ruthenium atom were located by a Patterson function using the program XS. The remaining atoms were located in the difference-Fourier maps, refined on F<sup>2</sup> by full matrix least squares techniques using SHELX with 5,811 independent reflections within the range of  $\theta$  1.5° to 27.56° (completeness 97.2%). Absorption corrections were applied by SADABS,<sup>9</sup> with an R<sub>(int)</sub> = 6.1 %. Calculated hydrogen position were input and refined in a riding manner along with the corresponding carbons. A summary of the refinement details and the resulting factors are given in Table (C<sub>18</sub>H<sub>20</sub>BF<sub>3</sub>N<sub>5</sub>O<sub>6</sub>RuS).

Final structure refinement for C<sub>18</sub>H<sub>20</sub>BF<sub>3</sub>N<sub>5</sub>O<sub>6</sub>RuS at convergence resulted in R<sub>1</sub> = 5.6 % and wR<sub>2</sub> = 12.4 % for those 5811 data with I > 4 $\sigma$ . The data to parameter ratio is 18 : 1. The crystal system found is monoclinic, space group C2/c with Z equal to 8 and unit cell dimensions: a = 23.644(8) Å b = 8.032(3) Å, c = 29.052(9) Å.

There are two water molecules located in the crystal lattice in the proximity of the trifluoromethanesulfonate. The triflate anion was located in the asymmetric unit cell and behaved well throughout anisotropic refinement.

**Table S5.** Crystal Data and Structure Refinement for **1**.

|                                   |                                                                                   |                   |
|-----------------------------------|-----------------------------------------------------------------------------------|-------------------|
| Empirical formula                 | C <sub>18</sub> H <sub>20</sub> BF <sub>3</sub> N <sub>5</sub> O <sub>6</sub> RuS |                   |
| Formula weight                    | 603.33                                                                            |                   |
| Temperature                       | 200(2) K                                                                          |                   |
| Wavelength                        | 0.71073 Å                                                                         |                   |
| Crystal system                    | Monoclinic                                                                        |                   |
| Space group                       | C2/c                                                                              |                   |
| Unit cell dimensions              | a = 23.644(8) Å                                                                   | a = 90°.          |
|                                   | b = 8.032(3) Å                                                                    | b = 110.535(5) °. |
|                                   | c = 29.052(9) Å                                                                   | g = 90°.          |
| Volume                            | 5167(3) Å <sup>3</sup>                                                            |                   |
| Z                                 | 8                                                                                 |                   |
| Density (calculated)              | 1.551 Mg/m <sup>3</sup>                                                           |                   |
| Absorption coefficient            | 0.750 mm <sup>-1</sup>                                                            |                   |
| F(000)                            | 2424                                                                              |                   |
| Crystal size                      | 0.48 x 0.12 x 0.10 mm <sup>3</sup>                                                |                   |
| Theta range for data collection   | 1.50 to 27.56°.                                                                   |                   |
| Index ranges                      | -30<=h<=28, -7<=k<=10, -37<=l<=37                                                 |                   |
| Reflections collected             | 15109                                                                             |                   |
| Independent reflections           | 5811 [R(int) = 0.0606]                                                            |                   |
| Completeness to theta = 27.56°    | 97.2%                                                                             |                   |
| Absorption correction             | Empirical                                                                         |                   |
| Max. and min. transmission        | 0.9288 and 0.7147                                                                 |                   |
| Refinement method                 | Full-matrix least-squares on F <sup>2</sup>                                       |                   |
| Data / restraints / parameters    | 5811 / 0 / 320                                                                    |                   |
| Goodness-of-fit on F <sup>2</sup> | 0.984                                                                             |                   |
| Final R indices [I>2sigma(I)]     | R1 = 0.0561, wR2 = 0.1236                                                         |                   |
| R indices (all data)              | R1 = 0.1040, wR2 = 0.1421                                                         |                   |
| Largest diff. peak and hole       | 0.690 and -0.559 Å <sup>-3</sup>                                                  |                   |

**Table S6.** Atomic coordinates ( $\times 10^4$ ) and equivalent isotropic displacement parameters ( $\text{\AA}^2 \times 10^3$ ) for  $\text{C}_{18}\text{H}_{20}\text{BF}_3\text{N}_5\text{O}_6\text{RuS}$ .  $U(\text{eq})$  is defined as one third of the trace of the orthogonalized  $U^{ij}$  tensor.

|       | x        | y        | z        | U(eq)   |
|-------|----------|----------|----------|---------|
| Ru(1) | 3215(1)  | 5806(1)  | 8947(1)  | 34(1)   |
| B(1)  | 3623(3)  | 4406(7)  | 8225(2)  | 41(1)   |
| N(1)  | 2615(2)  | 5016(5)  | 8286(1)  | 35(1)   |
| N(2)  | 3593(2)  | 3491(5)  | 9034(1)  | 38(1)   |
| N(3)  | 3871(2)  | 6474(5)  | 9589(2)  | 38(1)   |
| N(4)  | 2828(2)  | 8102(5)  | 8797(1)  | 37(1)   |
| N(5)  | 2686(2)  | 5359(5)  | 9339(2)  | 40(1)   |
| O(1)  | 3747(1)  | 6074(4)  | 8505(1)  | 38(1)   |
| C(1)  | 2012(2)  | 5082(6)  | 8139(2)  | 41(1)   |
| C(2)  | 1647(2)  | 4486(7)  | 7693(2)  | 50(1)   |
| C(3)  | 1914(3)  | 3795(7)  | 7384(2)  | 54(2)   |
| C(4)  | 2533(3)  | 3754(6)  | 7532(2)  | 48(1)   |
| C(5)  | 2888(2)  | 4393(6)  | 7982(2)  | 41(1)   |
| C(6)  | 3977(3)  | 4219(8)  | 7843(2)  | 59(2)   |
| C(7)  | 3761(2)  | 2992(6)  | 8652(2)  | 40(1)   |
| C(8)  | 4014(2)  | 1429(7)  | 8666(2)  | 44(1)   |
| C(9)  | 4100(2)  | 386(7)   | 9057(2)  | 52(2)   |
| C(10) | 3944(2)  | 930(7)   | 9453(2)  | 52(1)   |
| C(11) | 3693(2)  | 2485(6)  | 9428(2)  | 44(1)   |
| C(12) | 4230(2)  | 6691(6)  | 9959(2)  | 45(1)   |
| C(13) | 4698(3)  | 6966(8)  | 10438(2) | 81(2)   |
| C(14) | 2572(2)  | 9320(7)  | 8691(2)  | 42(1)   |
| C(15) | 2251(3)  | 10893(7) | 8557(2)  | 64(2)   |
| C(16) | 2411(3)  | 5201(7)  | 9585(2)  | 52(1)   |
| C(17) | 2059(3)  | 5027(10) | 9912(2)  | 90(2)   |
| C(18) | 4543(5)  | 2256(18) | 1549(4)  | 126(4)  |
| F(1)  | 4525(3)  | 3771(14) | 1736(2)  | 202(4)  |
| F(2)  | 5055(3)  | 1584(11) | 1812(2)  | 195(4)  |
| F(3)  | 4081(3)  | 1627(14) | 1618(3)  | 225(4)  |
| S(1)  | 4463(1)  | 2433(2)  | 924(1)   | 69(1)   |
| O(2)  | 3911(2)  | 3322(7)  | 699(2)   | 99(2)   |
| O(3)  | 4430(3)  | 769(8)   | 763(3)   | 145(3)  |
| O(4)  | 4998(2)  | 3286(6)  | 943(2)   | 79(1)   |
| O(5)  | 3417(6)  | 6398(18) | 736(5)   | 301(7)  |
| O(6)  | 4135(12) | 8410(70) | 1496(9)  | 780(40) |



**Table S7.** Bond lengths [Å] and angles [°] for C<sub>18</sub>H<sub>20</sub>BF<sub>3</sub>N<sub>5</sub>O<sub>6</sub>RuS.

|            |          |             |           |
|------------|----------|-------------|-----------|
| Ru(1)-N(5) | 1.997(4) | C(2)-C(3)   | 1.381(8)  |
| Ru(1)-N(3) | 2.034(4) | C(3)-C(4)   | 1.374(8)  |
| Ru(1)-N(4) | 2.038(4) | C(4)-C(5)   | 1.382(7)  |
| Ru(1)-N(2) | 2.040(4) | C(7)-C(8)   | 1.385(7)  |
| Ru(1)-N(1) | 2.047(4) | C(8)-C(9)   | 1.370(7)  |
| Ru(1)-O(1) | 2.099(3) | C(9)-C(10)  | 1.394(8)  |
| B(1)-O(1)  | 1.542(6) | C(10)-C(11) | 1.374(7)  |
| B(1)-C(6)  | 1.614(7) | C(12)-C(13) | 1.459(7)  |
| B(1)-C(7)  | 1.630(8) | C(14)-C(15) | 1.455(7)  |
| B(1)-C(5)  | 1.630(8) | C(16)-C(17) | 1.474(8)  |
| N(1)-C(1)  | 1.339(6) | C(18)-F(3)  | 1.284(10) |
| N(1)-C(5)  | 1.360(6) | C(18)-F(2)  | 1.300(12) |
| N(2)-C(11) | 1.352(6) | C(18)-F(1)  | 1.339(14) |
| N(2)-C(7)  | 1.363(6) | C(18)-S(1)  | 1.765(11) |
| N(3)-C(12) | 1.126(6) | S(1)-O(3)   | 1.409(6)  |
| N(4)-C(14) | 1.134(6) | S(1)-O(4)   | 1.422(4)  |
| N(5)-C(16) | 1.129(6) | S(1)-O(2)   | 1.428(5)  |
| C(1)-C(2)  | 1.367(7) |             |           |

|                  |            |                  |           |
|------------------|------------|------------------|-----------|
| N(5)-Ru(1)-N(3)  | 87.39(16)  | B(1)-O(1)-Ru(1)  | 101.0(3)  |
| N(5)-Ru(1)-N(4)  | 87.70(16)  | N(1)-C(1)-C(2)   | 122.4(5)  |
| N(3)-Ru(1)-N(4)  | 95.68(15)  | C(1)-C(2)-C(3)   | 118.4(5)  |
| N(5)-Ru(1)-N(2)  | 95.77(16)  | C(4)-C(3)-C(2)   | 119.1(5)  |
| N(3)-Ru(1)-N(2)  | 88.11(15)  | C(3)-C(4)-C(5)   | 120.9(5)  |
| N(4)-Ru(1)-N(2)  | 174.98(15) | N(1)-C(5)-C(4)   | 118.9(5)  |
| N(5)-Ru(1)-N(1)  | 96.39(16)  | N(1)-C(5)-B(1)   | 113.2(4)  |
| N(3)-Ru(1)-N(1)  | 174.75(16) | C(4)-C(5)-B(1)   | 127.8(5)  |
| N(4)-Ru(1)-N(1)  | 88.13(15)  | N(2)-C(7)-C(8)   | 119.3(5)  |
| N(2)-Ru(1)-N(1)  | 87.89(15)  | N(2)-C(7)-B(1)   | 112.2(4)  |
| N(5)-Ru(1)-O(1)  | 174.98(15) | C(8)-C(7)-B(1)   | 128.5(5)  |
| N(3)-Ru(1)-O(1)  | 96.09(14)  | C(9)-C(8)-C(7)   | 121.0(5)  |
| N(4)-Ru(1)-O(1)  | 95.54(14)  | C(8)-C(9)-C(10)  | 119.1(5)  |
| N(2)-Ru(1)-O(1)  | 80.76(14)  | C(11)-C(10)-C(9) | 118.5(5)  |
| N(1)-Ru(1)-O(1)  | 79.91(14)  | N(2)-C(11)-C(10) | 122.1(5)  |
| O(1)-B(1)-C(6)   | 113.3(4)   | N(3)-C(12)-C(13) | 179.8(7)  |
| O(1)-B(1)-C(7)   | 104.6(4)   | N(4)-C(14)-C(15) | 179.3(6)  |
| C(6)-B(1)-C(7)   | 116.4(4)   | N(5)-C(16)-C(17) | 178.8(6)  |
| O(1)-B(1)-C(5)   | 102.1(4)   | F(3)-C(18)-F(2)  | 114.4(10) |
| C(6)-B(1)-C(5)   | 115.7(4)   | F(3)-C(18)-F(1)  | 98.2(11)  |
| C(7)-B(1)-C(5)   | 102.9(4)   | F(2)-C(18)-F(1)  | 107.1(11) |
| C(1)-N(1)-C(5)   | 120.2(4)   | F(3)-C(18)-S(1)  | 113.7(9)  |
| C(1)-N(1)-Ru(1)  | 126.7(3)   | F(2)-C(18)-S(1)  | 112.4(9)  |
| C(5)-N(1)-Ru(1)  | 113.1(3)   | F(1)-C(18)-S(1)  | 109.8(9)  |
| C(11)-N(2)-C(7)  | 119.9(4)   | O(3)-S(1)-O(4)   | 114.5(4)  |
| C(11)-N(2)-Ru(1) | 126.0(3)   | O(3)-S(1)-O(2)   | 112.8(4)  |
| C(7)-N(2)-Ru(1)  | 114.0(3)   | O(4)-S(1)-O(2)   | 115.7(3)  |
| C(12)-N(3)-Ru(1) | 173.3(4)   | O(3)-S(1)-C(18)  | 103.7(6)  |
| C(14)-N(4)-Ru(1) | 174.8(4)   | O(4)-S(1)-C(18)  | 103.0(4)  |
| C(16)-N(5)-Ru(1) | 174.6(4)   | O(2)-S(1)-C(18)  | 105.3(5)  |

**Table S8.** Hydrogen coordinates ( $\times 10^4$ ) and isotropic displacement parameters ( $\text{\AA}^2 \times 10^3$ ) for  $\text{C}_{18}\text{H}_{20}\text{BF}_3\text{N}_5\text{O}_6\text{RuS}$ .

|        | x    | y     | z     | U(eq) |
|--------|------|-------|-------|-------|
| H(1)   | 1831 | 5561  | 8353  | 50    |
| H(2)   | 1220 | 4545  | 7598  | 59    |
| H(3)   | 1672 | 3355  | 7074  | 65    |
| H(4)   | 2719 | 3278  | 7321  | 57    |
| H(6A)  | 3880 | 5168  | 7617  | 89    |
| H(6B)  | 3853 | 3184  | 7656  | 89    |
| H(6C)  | 4413 | 4191  | 8025  | 89    |
| H(8)   | 4129 | 1076  | 8399  | 53    |
| H(9)   | 4264 | -696  | 9060  | 63    |
| H(10)  | 4009 | 241   | 9732  | 62    |
| H(11)  | 3586 | 2866  | 9697  | 52    |
| H(13A) | 4547 | 7741  | 10629 | 121   |
| H(13B) | 5057 | 7438  | 10393 | 121   |
| H(13C) | 4802 | 5904  | 10614 | 121   |
| H(15A) | 1911 | 10909 | 8675  | 96    |
| H(15B) | 2101 | 11016 | 8199  | 96    |
| H(15C) | 2527 | 11813 | 8707  | 96    |
| H(17A) | 2282 | 4326  | 10194 | 135   |
| H(17B) | 1669 | 4510  | 9732  | 135   |
| H(17C) | 1993 | 6128  | 10030 | 135   |

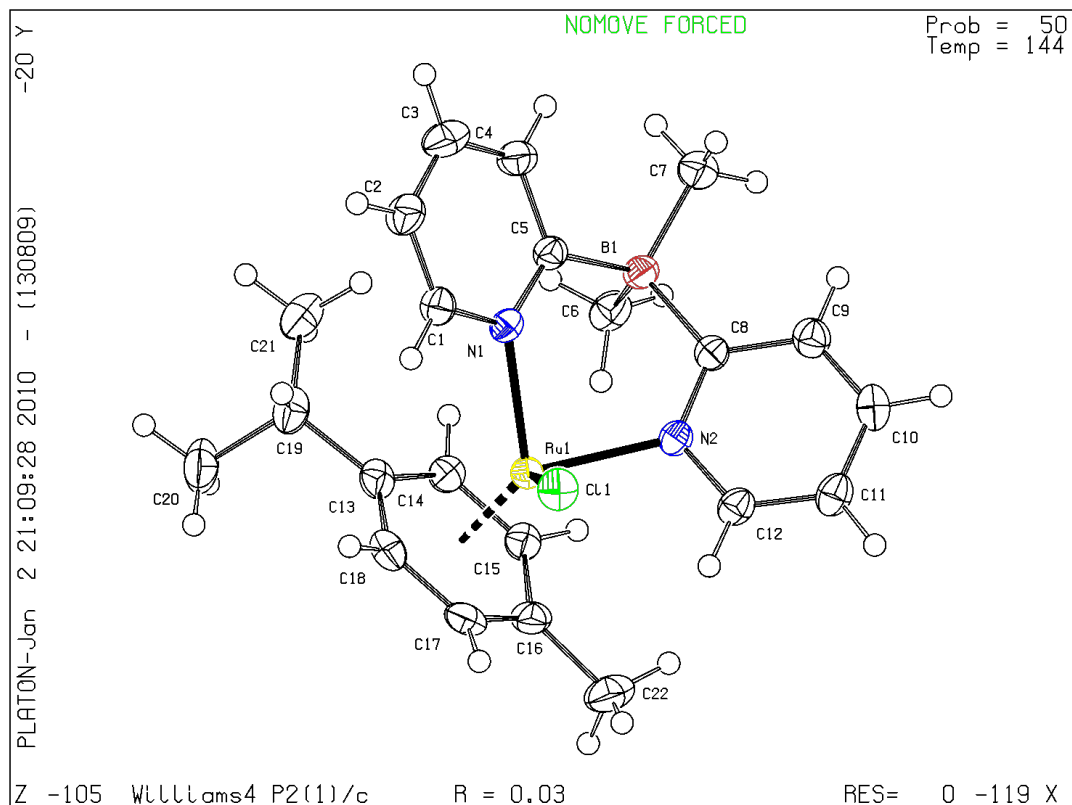

**Figure S16.** ORTEP diagram of complex **4**. Ellipsoids are drawn at the 50% probability level.

Red blocks of compound **4** (CCDC 738031) were grown by slow diffusion of hexanes into a concentrated, benzene solution. Diffraction data were collected at 144(2) K on a SMART APEX CCD platform diffractometer with graphite fine-focused monochromatic Mo-K $\alpha$  radiation ( $\lambda = 0.71073 \text{ \AA}$ ). The cell parameters for (C<sub>22</sub>H<sub>28</sub>BCIN<sub>2</sub>Ru) were obtained from the least-squares refinement of the spots (from 60 collected frames) using the SMART program on a single crystal sample measuring 0.51 x 0.14 x 0.01 mm<sup>3</sup>. A hemisphere of data were collected (10 s/frame scan time for a sphere of diffraction data) up to a resolution of 0.77  $\text{\AA}$  and the intensity data were processed using the “Saint Plus” program to yield the reflection data file. All calculations for the structure determination were carried out using the SHELXTL package (version 6.14). Initial position of the ruthenium atom were located by a Patterson function using the program XS. The remaining atoms were located in the difference-Fourier maps, refined on F<sup>2</sup> by full matrix least squares techniques using SHELX with 5,811 independent reflections within the range of  $\theta$  1.5° to 27.56° (completeness 97.6%). Absorption corrections were applied by SADABS, with an R<sub>(int)</sub> = 3.1 %. Calculated hydrogen position were input and refined in a riding manner along with the corresponding carbons. A summary of the refinement details and the resulting factors are given in **Table S9** (C<sub>22</sub>H<sub>28</sub>BCIN<sub>2</sub>Ru).

Final structure refinement for  $C_{22}H_{28}BClN_2Ru$  at convergence resulted in  $R_1 = 3.2\%$  and  $wR_2 = 7.6\%$  for those 4645 data with  $I > 4\sigma$ . The data to parameter ratio is 19:1. The crystal system found is monoclinic, space group P2(1)/c with Z equal to 4 and unit cell dimensions:  $a = 8.988(8) \text{ \AA}$ ,  $b = 13.637(13) \text{ \AA}$ ,  $c = 17.364(16) \text{ \AA}$ .

**Table S9.** Crystal data and structure refinement for  $C_{22}H_{28}BClN_2Ru$ .

|                                        |                                                                  |                              |
|----------------------------------------|------------------------------------------------------------------|------------------------------|
| Empirical formula                      | $C_{22}H_{28}BClN_2Ru$                                           |                              |
| Formula weight                         | 467.79                                                           |                              |
| Temperature                            | 144(2) K                                                         |                              |
| Wavelength                             | 0.71073 $\text{\AA}$                                             |                              |
| Crystal system                         | Monoclinic                                                       |                              |
| Space group                            | P2(1)/c                                                          |                              |
| Unit cell dimensions                   | $a = 8.9877(8) \text{ \AA}$                                      | $\alpha = 90^\circ$ .        |
|                                        | $b = 13.6367(13) \text{ \AA}$                                    | $\beta = 103.424(2)^\circ$ . |
|                                        | $c = 17.3641(16) \text{ \AA}$                                    | $\gamma = 90^\circ$ .        |
| Volume                                 | 2070.0(3) $\text{\AA}^3$                                         |                              |
| Z                                      | 4                                                                |                              |
| Density (calculated)                   | 1.501 $\text{Mg/m}^3$                                            |                              |
| Absorption coefficient                 | 0.895 $\text{mm}^{-1}$                                           |                              |
| F(000)                                 | 960                                                              |                              |
| Crystal size                           | 0.51 x 0.14 x 0.01 $\text{mm}^3$                                 |                              |
| Theta range for data collection        | 1.92 to 27.51 $^\circ$ .                                         |                              |
| Index ranges                           | -11 $\leq h \leq$ 11, -17 $\leq k \leq$ 17, -22 $\leq l \leq$ 16 |                              |
| Reflections collected                  | 12497                                                            |                              |
| Independent reflections                | 4645 [R(int) = 0.0310]                                           |                              |
| Completeness to theta = 27.51 $^\circ$ | 97.6%                                                            |                              |
| Absorption correction                  | Semi-empirical                                                   |                              |
| Max. and min. transmission             | 0.9938 and 0.6600                                                |                              |
| Refinement method                      | Full-matrix least-squares on $F^2$                               |                              |
| Data / restraints / parameters         | 4645 / 0 / 249                                                   |                              |
| Goodness-of-fit on $F^2$               | 1.058                                                            |                              |
| Final R indices [ $I > 2\sigma(I)$ ]   | R1 = 0.0322, wR2 = 0.0760                                        |                              |
| R indices (all data)                   | R1 = 0.0421, wR2 = 0.0800                                        |                              |
| Largest diff. peak and hole            | 0.931 and -0.281 $\text{e.\AA}^{-3}$                             |                              |

**Table S10.** Bond lengths [ $\text{\AA}$ ] and angles [ $^\circ$ ] for  $\text{C}_{22}\text{H}_{28}\text{BClN}_2\text{Ru}$ .

|             |            |             |          |
|-------------|------------|-------------|----------|
| Ru(1)-N(1)  | 2.0982(19) | C(2)-C(3)   | 1.384(4) |
| Ru(1)-N(2)  | 2.117(2)   | C(3)-C(4)   | 1.371(4) |
| Ru(1)-C(15) | 2.185(2)   | C(4)-C(5)   | 1.412(3) |
| Ru(1)-C(14) | 2.191(2)   | C(8)-C(9)   | 1.401(3) |
| Ru(1)-C(17) | 2.194(2)   | C(9)-C(10)  | 1.379(4) |
| Ru(1)-C(18) | 2.200(2)   | C(10)-C(11) | 1.383(4) |
| Ru(1)-C(13) | 2.240(2)   | C(11)-C(12) | 1.370(4) |
| Ru(1)-C(16) | 2.247(2)   | C(13)-C(18) | 1.396(3) |
| Ru(1)-Cl(1) | 2.4212(6)  | C(13)-C(14) | 1.422(3) |
| B(1)-C(7)   | 1.634(4)   | C(13)-C(19) | 1.523(3) |
| B(1)-C(5)   | 1.636(4)   | C(14)-C(15) | 1.409(3) |
| B(1)-C(8)   | 1.644(4)   | C(15)-C(16) | 1.427(3) |
| B(1)-C(6)   | 1.656(4)   | C(16)-C(17) | 1.386(4) |
| N(1)-C(1)   | 1.352(3)   | C(16)-C(22) | 1.513(3) |
| N(1)-C(5)   | 1.361(3)   | C(17)-C(18) | 1.433(3) |
| N(2)-C(12)  | 1.353(3)   | C(19)-C(21) | 1.534(4) |
| N(2)-C(8)   | 1.362(3)   | C(19)-C(20) | 1.533(4) |
| C(1)-C(2)   | 1.370(3)   |             |          |

|                   |            |                   |            |
|-------------------|------------|-------------------|------------|
| N(1)-Ru(1)-N(2)   | 85.60(8)   | C(12)-N(2)-C(8)   | 120.2(2)   |
| N(1)-Ru(1)-C(15)  | 126.59(8)  | C(12)-N(2)-Ru(1)  | 114.88(16) |
| N(2)-Ru(1)-C(15)  | 93.88(9)   | C(8)-N(2)-Ru(1)   | 124.88(15) |
| N(1)-Ru(1)-C(14)  | 96.24(8)   | N(1)-C(1)-C(2)    | 123.2(2)   |
| N(2)-Ru(1)-C(14)  | 116.09(9)  | C(1)-C(2)-C(3)    | 117.9(2)   |
| C(15)-Ru(1)-C(14) | 37.57(9)   | C(4)-C(3)-C(2)    | 118.8(2)   |
| N(1)-Ru(1)-C(17)  | 147.19(9)  | C(3)-C(4)-C(5)    | 122.7(3)   |
| N(2)-Ru(1)-C(17)  | 125.81(9)  | N(1)-C(5)-C(4)    | 116.5(2)   |
| C(15)-Ru(1)-C(17) | 66.65(10)  | N(1)-C(5)-B(1)    | 122.5(2)   |
| C(14)-Ru(1)-C(17) | 79.18(9)   | C(4)-C(5)-B(1)    | 121.0(2)   |
| N(1)-Ru(1)-C(18)  | 110.21(9)  | N(2)-C(8)-C(9)    | 117.4(2)   |
| N(2)-Ru(1)-C(18)  | 163.86(9)  | N(2)-C(8)-B(1)    | 121.2(2)   |
| C(15)-Ru(1)-C(18) | 79.47(10)  | C(9)-C(8)-B(1)    | 121.4(2)   |
| C(14)-Ru(1)-C(18) | 66.79(10)  | C(10)-C(9)-C(8)   | 122.5(3)   |
| C(17)-Ru(1)-C(18) | 38.05(9)   | C(9)-C(10)-C(11)  | 118.3(2)   |
| N(1)-Ru(1)-C(13)  | 89.27(8)   | C(12)-C(11)-C(10) | 118.4(2)   |
| N(2)-Ru(1)-C(13)  | 152.19(9)  | N(2)-C(12)-C(11)  | 123.2(2)   |
| C(15)-Ru(1)-C(13) | 67.62(9)   | C(18)-C(13)-C(14) | 118.1(2)   |
| C(14)-Ru(1)-C(13) | 37.43(9)   | C(18)-C(13)-C(19) | 118.7(2)   |
| C(17)-Ru(1)-C(13) | 67.27(10)  | C(14)-C(13)-C(19) | 123.2(2)   |
| C(18)-Ru(1)-C(13) | 36.63(9)   | C(18)-C(13)-Ru(1) | 70.15(14)  |
| N(1)-Ru(1)-C(16)  | 163.51(8)  | C(14)-C(13)-Ru(1) | 69.41(14)  |
| N(2)-Ru(1)-C(16)  | 98.54(9)   | C(19)-C(13)-Ru(1) | 132.38(17) |
| C(15)-Ru(1)-C(16) | 37.54(9)   | C(15)-C(14)-C(13) | 120.9(2)   |
| C(14)-Ru(1)-C(16) | 67.57(9)   | C(15)-C(14)-Ru(1) | 71.01(13)  |
| C(17)-Ru(1)-C(16) | 36.34(10)  | C(13)-C(14)-Ru(1) | 73.16(14)  |
| C(18)-Ru(1)-C(16) | 67.25(10)  | C(14)-C(15)-C(16) | 120.9(2)   |
| C(13)-Ru(1)-C(16) | 79.62(9)   | C(14)-C(15)-Ru(1) | 71.43(13)  |
| N(1)-Ru(1)-Cl(1)  | 85.67(5)   | C(16)-C(15)-Ru(1) | 73.56(14)  |
| N(2)-Ru(1)-Cl(1)  | 84.81(5)   | C(17)-C(16)-C(15) | 117.6(2)   |
| C(15)-Ru(1)-Cl(1) | 147.59(7)  | C(17)-C(16)-C(22) | 121.9(2)   |
| C(14)-Ru(1)-Cl(1) | 159.09(7)  | C(15)-C(16)-C(22) | 120.5(3)   |
| C(17)-Ru(1)-Cl(1) | 87.94(7)   | C(17)-C(16)-Ru(1) | 69.78(14)  |
| C(18)-Ru(1)-Cl(1) | 92.95(7)   | C(15)-C(16)-Ru(1) | 68.90(14)  |
| C(13)-Ru(1)-Cl(1) | 122.07(7)  | C(22)-C(16)-Ru(1) | 132.71(19) |
| C(16)-Ru(1)-Cl(1) | 110.53(7)  | C(16)-C(17)-C(18) | 121.8(2)   |
| C(7)-B(1)-C(5)    | 108.8(2)   | C(16)-C(17)-Ru(1) | 73.88(15)  |
| C(7)-B(1)-C(8)    | 111.4(2)   | C(18)-C(17)-Ru(1) | 71.20(14)  |
| C(5)-B(1)-C(8)    | 107.5(2)   | C(13)-C(18)-C(17) | 120.5(2)   |
| C(7)-B(1)-C(6)    | 105.6(2)   | C(13)-C(18)-Ru(1) | 73.22(14)  |
| C(5)-B(1)-C(6)    | 114.9(2)   | C(17)-C(18)-Ru(1) | 70.74(14)  |
| C(8)-B(1)-C(6)    | 108.8(2)   | C(13)-C(19)-C(21) | 114.9(2)   |
| C(1)-N(1)-C(5)    | 120.9(2)   | C(13)-C(19)-C(20) | 107.7(2)   |
| C(1)-N(1)-Ru(1)   | 114.89(16) | C(21)-C(19)-C(20) | 110.4(2)   |
| C(5)-N(1)-Ru(1)   | 123.89(16) |                   |            |

**Table S11.** Atomic coordinates ( $\times 10^4$ ) and equivalent isotropic displacement parameters ( $\text{\AA}^2 \times 10^3$ ) for  $\text{C}_{22}\text{H}_{28}\text{BClN}_2\text{Ru}$ .  $U(\text{eq})$  is defined as one third of the trace of the orthogonalized  $U^{ij}$  tensor.

|       | x        | y       | z       | U(eq) |
|-------|----------|---------|---------|-------|
| Ru(1) | 5956(1)  | 3974(1) | 1771(1) | 20(1) |
| B(1)  | 9390(3)  | 4488(2) | 3072(2) | 26(1) |
| Cl(1) | 4522(1)  | 5457(1) | 1340(1) | 30(1) |
| N(1)  | 7862(2)  | 4757(1) | 1600(1) | 22(1) |
| N(2)  | 6423(2)  | 4632(1) | 2906(1) | 23(1) |
| C(1)  | 7720(3)  | 5123(2) | 863(2)  | 26(1) |
| C(2)  | 8910(3)  | 5540(2) | 610(2)  | 33(1) |
| C(3)  | 10319(3) | 5588(2) | 1141(2) | 38(1) |
| C(4)  | 10452(3) | 5239(2) | 1894(2) | 31(1) |
| C(5)  | 9213(3)  | 4819(2) | 2149(2) | 24(1) |
| C(6)  | 9605(3)  | 3295(2) | 3237(2) | 33(1) |
| C(7)  | 10928(3) | 4997(2) | 3611(2) | 38(1) |
| C(8)  | 7846(3)  | 4856(2) | 3343(1) | 24(1) |
| C(9)  | 7942(3)  | 5385(2) | 4044(2) | 30(1) |
| C(10) | 6667(3)  | 5640(2) | 4314(2) | 32(1) |
| C(11) | 5246(3)  | 5365(2) | 3869(2) | 30(1) |
| C(12) | 5171(3)  | 4879(2) | 3171(2) | 27(1) |
| C(13) | 6378(3)  | 2841(2) | 912(2)  | 27(1) |
| C(14) | 6925(3)  | 2511(2) | 1705(2) | 26(1) |
| C(15) | 5954(3)  | 2484(2) | 2235(2) | 26(1) |
| C(16) | 4389(3)  | 2775(2) | 1989(2) | 30(1) |
| C(17) | 3891(3)  | 3139(2) | 1228(2) | 31(1) |
| C(18) | 4871(3)  | 3174(2) | 685(2)  | 30(1) |
| C(19) | 7355(3)  | 2844(2) | 303(2)  | 34(1) |
| C(20) | 6850(4)  | 1974(2) | -256(2) | 47(1) |
| C(21) | 9086(3)  | 2806(2) | 653(2)  | 39(1) |
| C(22) | 3331(3)  | 2685(2) | 2548(2) | 43(1) |



**Table S12.** Hydrogen coordinates ( $\times 10^4$ ) and isotropic displacement parameters ( $\text{\AA}^2 \times 10^3$ ) for  $\text{C}_{22}\text{H}_{28}\text{BClN}_2\text{Ru}$ .

|        | x     | y    | z    | U(eq) |
|--------|-------|------|------|-------|
| H(1)   | 6748  | 5090 | 503  | 31    |
| H(2)   | 8772  | 5788 | 87   | 39    |
| H(3)   | 11179 | 5859 | 986  | 46    |
| H(4)   | 11417 | 5282 | 2260 | 37    |
| H(6A)  | 10229 | 3019 | 2896 | 49    |
| H(6B)  | 8599  | 2977 | 3119 | 49    |
| H(6C)  | 10113 | 3182 | 3793 | 49    |
| H(7A)  | 11833 | 4727 | 3463 | 56    |
| H(7B)  | 10988 | 4861 | 4172 | 56    |
| H(7C)  | 10887 | 5707 | 3523 | 56    |
| H(9)   | 8922  | 5575 | 4346 | 36    |
| H(10)  | 6763  | 5995 | 4794 | 38    |
| H(11)  | 4343  | 5511 | 4042 | 36    |
| H(12)  | 4193  | 4706 | 2857 | 33    |
| H(14)  | 8049  | 2410 | 1913 | 31    |
| H(15)  | 6405  | 2363 | 2810 | 32    |
| H(17)  | 2888  | 3492 | 1087 | 37    |
| H(18)  | 4533  | 3543 | 177  | 35    |
| H(19)  | 7125  | 3460 | -15  | 41    |
| H(20A) | 7064  | 1360 | 42   | 71    |
| H(20B) | 7412  | 1984 | -676 | 71    |
| H(20C) | 5750  | 2023 | -491 | 71    |
| H(21A) | 9352  | 2184 | 934  | 59    |
| H(21B) | 9386  | 3352 | 1023 | 59    |
| H(21C) | 9627  | 2858 | 225  | 59    |
| H(22A) | 2471  | 3140 | 2384 | 64    |
| H(22B) | 3894  | 2847 | 3088 | 64    |
| H(22C) | 2944  | 2012 | 2536 | 64    |

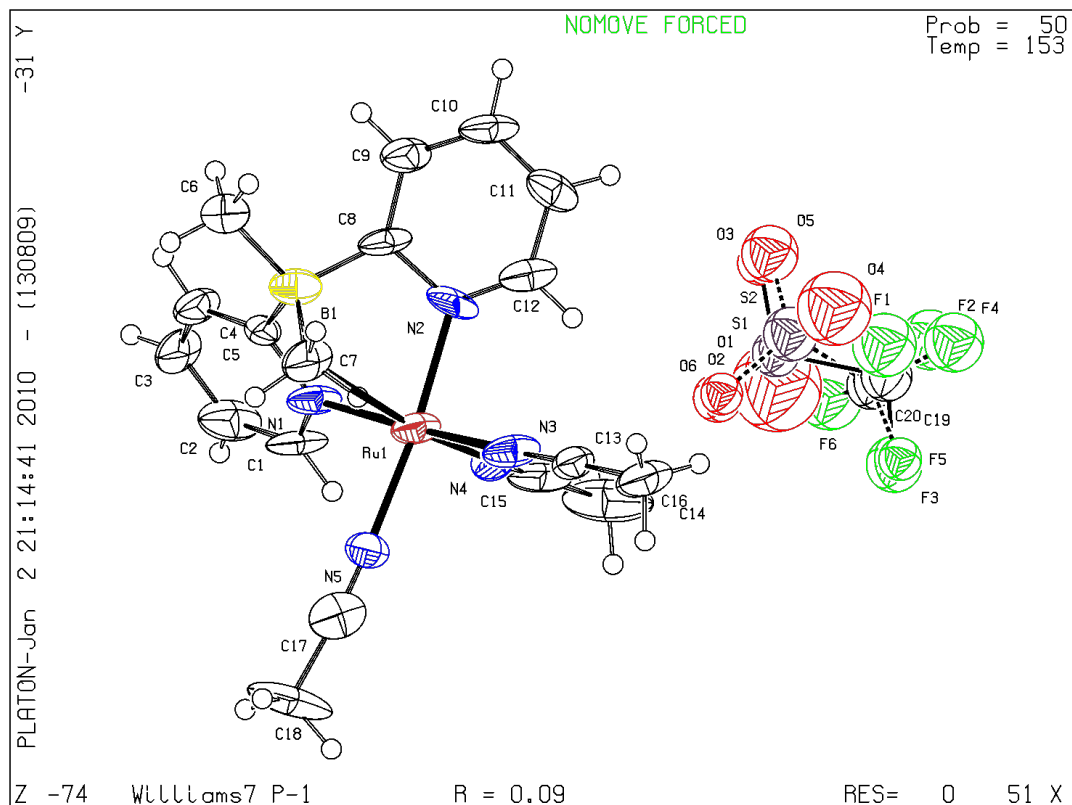

**Figure S17.** ORTEP diagram of complex **7**. Ellipsoids are drawn at the 50% probability level.

Small orange needles of compound **7** were grown by slow diffusion of hexanes into a concentrated, cooled ( $-40\text{ }^{\circ}\text{C}$ ) dichloromethane solution. Diffraction data were collected at  $153(2)\text{ K}$  on a SMART APEX CCD platform diffractometer with graphite fine-focused monochromatic  $\text{Mo-K}\alpha$  radiation ( $\lambda = 0.71073\text{ \AA}$ ). The cell parameters for ( $\text{C}_{19}\text{H}_{22}\text{BF}_3\text{N}_5\text{O}_3\text{RuS}$ ) were obtained from the least-squares refinement of the spots using the SMART program on a single crystal sample measuring  $0.08 \times 0.04 \times 0.04\text{ mm}^3$ . A hemisphere of data were collected (10 s/frame scan time for a sphere of diffraction data) up to a resolution of  $0.77\text{ \AA}$  and the intensity data were processed using the “Saint Plus” program to yield the reflection data file. All calculations for the structure determination were carried out using the SHELXTL package (version 6.14). Initial position of the ruthenium atom were located by a Patterson function using the program XS. The remaining atoms were located in the difference-Fourier maps, refined on  $F^2$  by full matrix least squares techniques using SHELX with 5724 independent reflections within the range of  $\theta\ 1.30^{\circ}$  to  $28.40^{\circ}$  (completeness 78.4%). Absorption corrections were applied by SADABS. Calculated hydrogen position were input and refined in a riding manner along with the corresponding carbons. A summary of the refinement details and the resulting factors are given in **Table S13** ( $\text{C}_{19}\text{H}_{22}\text{BF}_3\text{N}_5\text{O}_3\text{RuS}$ ).

Final structure refinement for  $C_{19}H_{22}BF_3N_5O_3RuS$  at convergence resulted in  $R_1 = 9.2\%$  and  $wR_2 = 18.9\%$  for those data with  $I > 4\sigma$ . The data to parameter ratio is 15.8:1. The crystal system found is triclinic, space group P-1 with  $Z$  equal to 2 and unit cell dimensions:  $a = 8.055(16) \text{ \AA}$ ,  $b = 9.457(18) \text{ \AA}$ ,  $c = 15.79(3) \text{ \AA}$ .

Because of the transient nature of **7**, it was difficult to form and preserve large crystals of this compound throughout the mounting and data acquisition process. Thus, the quantity of data collected for this sample is less good than for **1** and **4**. Fortunately, all atoms in the metal cation fragment were accurately located and refined. We found, however, that the triflate anion is highly disordered. This was modeled as two separate partially-occupied triflates with isotropic atoms.

**Table S13.** Crystal data and structure refinement for **7**.

|                                        |                                                                |                             |
|----------------------------------------|----------------------------------------------------------------|-----------------------------|
| Empirical formula                      | $C_{19}H_{22}BF_3N_5O_3RuS$                                    |                             |
| Formula weight                         | 569.36                                                         |                             |
| Temperature                            | 153(2) K                                                       |                             |
| Wavelength                             | 0.71073 $\text{\AA}$                                           |                             |
| Crystal system                         | Triclinic                                                      |                             |
| Space group                            | P-1                                                            |                             |
| Unit cell dimensions                   | $a = 8.055(16) \text{ \AA}$                                    | $\alpha = 96.57(4)^\circ$ . |
|                                        | $b = 9.457(18) \text{ \AA}$                                    | $\beta = 91.22(4)^\circ$ .  |
|                                        | $c = 15.79(3) \text{ \AA}$                                     | $\gamma = 95.44(3)^\circ$ . |
| Volume                                 | 1189(4) $\text{\AA}^3$                                         |                             |
| Z                                      | 2                                                              |                             |
| Density (calculated)                   | 1.590 $\text{Mg/m}^3$                                          |                             |
| Absorption coefficient                 | 0.801 $\text{mm}^{-1}$                                         |                             |
| F(000)                                 | 576                                                            |                             |
| Crystal size                           | 0.08 x 0.04 x 0.04 $\text{mm}^3$                               |                             |
| Theta range for data collection        | 1.30 to 28.40 $^\circ$ .                                       |                             |
| Index ranges                           | -8 $\leq h \leq$ 10, -12 $\leq k \leq$ 6, -15 $\leq l \leq$ 20 |                             |
| Reflections collected                  | 5724                                                           |                             |
| Independent reflections                | 4685 [R(int) = 0.0819]                                         |                             |
| Completeness to theta = 28.40 $^\circ$ | 78.4 %                                                         |                             |
| Absorption correction                  | Semi-empirical                                                 |                             |
| Refinement method                      | Full-matrix least-squares on $F^2$                             |                             |
| Data / restraints / parameters         | 4685 / 34 / 296                                                |                             |
| Goodness-of-fit on $F^2$               | 1.059                                                          |                             |
| Final R indices [ $I > 2\sigma(I)$ ]   | R1 = 0.0921, wR2 = 0.1887                                      |                             |
| R indices (all data)                   | R1 = 0.2026, wR2 = 0.2468                                      |                             |
| Largest diff. peak and hole            | 1.026 and -1.578 $e.\text{\AA}^{-3}$                           |                             |

**Table S14.** Atomic coordinates ( $\times 10^4$ ) and equivalent isotropic displacement parameters ( $\text{\AA}^2 \times 10^3$ ) for **7**. U(eq) is defined as one third of the trace of the orthogonalized  $U^{ij}$  tensor.

|       | x         | y         | z        | U(eq)   |
|-------|-----------|-----------|----------|---------|
| B(1)  | 6730(20)  | 7725(18)  | 9496(10) | 46(4)   |
| C(1)  | 6213(16)  | 9860(15)  | 7737(9)  | 55(5)   |
| C(2)  | 6968(19)  | 11217(15) | 7997(10) | 66(5)   |
| C(3)  | 7680(20)  | 11505(14) | 8799(10) | 62(5)   |
| C(4)  | 7654(18)  | 10443(14) | 9291(9)  | 52(4)   |
| C(5)  | 6858(16)  | 9085(13)  | 9041(8)  | 39(4)   |
| C(6)  | 7319(19)  | 8122(16)  | 10504(8) | 61(5)   |
| C(7)  | 4772(18)  | 6986(14)  | 9447(9)  | 60(5)   |
| C(8)  | 7879(17)  | 6631(13)  | 9058(9)  | 50(4)   |
| C(9)  | 9422(19)  | 6270(14)  | 9307(10) | 58(5)   |
| C(10) | 10286(18) | 5330(15)  | 8801(10) | 54(4)   |
| C(11) | 9636(17)  | 4787(14)  | 8006(10) | 51(4)   |
| C(12) | 8116(17)  | 5192(15)  | 7787(9)  | 46(4)   |
| C(13) | 3658(16)  | 3553(15)  | 7330(8)  | 40(4)   |
| C(14) | 2972(18)  | 2091(15)  | 7098(9)  | 62(5)   |
| C(15) | 6253(18)  | 6713(17)  | 6038(12) | 58(5)   |
| C(16) | 6840(20)  | 6580(20)  | 5109(11) | 104(8)  |
| C(17) | 1740(20)  | 8029(16)  | 7503(9)  | 58(5)   |
| C(18) | 89(17)    | 8685(17)  | 7459(11) | 93(7)   |
| N(1)  | 6152(13)  | 8812(11)  | 8229(7)  | 47(3)   |
| N(2)  | 7289(14)  | 6062(11)  | 8224(8)  | 47(3)   |
| N(3)  | 4116(13)  | 4737(12)  | 7567(7)  | 48(4)   |
| N(4)  | 5803(14)  | 6747(12)  | 6708(7)  | 38(3)   |
| N(5)  | 2953(14)  | 7578(11)  | 7597(7)  | 43(3)   |
| Ru(1) | 5127(2)   | 6767(1)   | 7852(1)  | 43(1)   |
| C(19) | 7570(40)  | 820(40)   | 4940(20) | 64(9)   |
| F(1)  | 7230(30)  | 20(20)    | 5514(16) | 100(8)  |
| F(2)  | 9100(30)  | 940(30)   | 4435(12) | 89(7)   |
| F(3)  | 6530(30)  | 1230(20)  | 4276(13) | 78(7)   |
| S(1)  | 8086(10)  | 2629(10)  | 5542(5)  | 55(3)   |
| O(1)  | 8450(60)  | 3520(50)  | 4930(30) | 200(20) |
| O(2)  | 6800(30)  | 3100(20)  | 5894(13) | 59(6)   |
| O(3)  | 9500(30)  | 2660(20)  | 6092(13) | 48(6)   |
| C(20) | 7920(50)  | 1540(40)  | 4730(20) | 58(10)  |
| F(4)  | 8540(30)  | 100(30)   | 4553(14) | 86(8)   |
| F(5)  | 6200(20)  | 750(20)   | 4474(12) | 45(5)   |
| F(6)  | 8510(30)  | 2930(30)  | 4494(18) | 105(9)  |
| O(4)  | 7470(50)  | 400(40)   | 6120(30) | 136(14) |
| O(5)  | 9290(40)  | 2150(30)  | 6261(18) | 79(10)  |
| O(6)  | 6370(30)  | 2580(20)  | 6134(13) | 43(6)   |
| S(2)  | 7807(14)  | 1821(14)  | 5850(7)  | 72(4)   |

**Table S15.** Bond lengths [Å] and angles [°] for **7**.

|             |           |             |           |
|-------------|-----------|-------------|-----------|
| B(1)-C(5)   | 1.540(19) | C(17)-C(18) | 1.52(2)   |
| B(1)-C(8)   | 1.56(2)   | N(1)-Ru(1)  | 2.047(11) |
| B(1)-C(6)   | 1.641(19) | N(2)-Ru(1)  | 2.022(10) |
| B(1)-C(7)   | 1.66(2)   | N(3)-Ru(1)  | 2.010(12) |
| C(1)-N(1)   | 1.325(15) | N(4)-Ru(1)  | 1.896(12) |
| C(1)-C(2)   | 1.381(18) | N(5)-Ru(1)  | 2.028(11) |
| C(2)-C(3)   | 1.369(16) | C(19)-F(1)  | 1.26(4)   |
| C(3)-C(4)   | 1.337(17) | C(19)-F(3)  | 1.44(4)   |
| C(4)-C(5)   | 1.390(17) | C(19)-F(2)  | 1.49(4)   |
| C(5)-N(1)   | 1.377(13) | C(19)-S(1)  | 1.87(4)   |
| C(8)-C(9)   | 1.381(17) | S(1)-O(2)   | 1.28(2)   |
| C(8)-N(2)   | 1.419(15) | S(1)-O(1)   | 1.37(5)   |
| C(9)-C(10)  | 1.38(2)   | S(1)-O(3)   | 1.412(19) |
| C(10)-C(11) | 1.373(17) | C(20)-F(6)  | 1.45(4)   |
| C(11)-C(12) | 1.366(17) | C(20)-F(4)  | 1.49(5)   |
| C(12)-N(2)  | 1.262(18) | C(20)-F(5)  | 1.54(4)   |
| C(13)-N(3)  | 1.162(15) | C(20)-S(2)  | 1.76(4)   |
| C(13)-C(14) | 1.442(18) | O(4)-S(2)   | 1.46(4)   |
| C(15)-N(4)  | 1.124(19) | O(5)-S(2)   | 1.34(3)   |
| C(15)-C(16) | 1.54(2)   | O(6)-S(2)   | 1.47(2)   |
| C(17)-N(5)  | 1.116(17) |             |           |

|                   |           |                 |           |
|-------------------|-----------|-----------------|-----------|
| C(5)-B(1)-C(8)    | 109.7(13) | N(4)-Ru(1)-N(2) | 92.1(5)   |
| C(5)-B(1)-C(6)    | 110.3(13) | N(3)-Ru(1)-N(2) | 90.2(4)   |
| C(8)-B(1)-C(6)    | 109.3(11) | N(4)-Ru(1)-N(5) | 92.8(5)   |
| C(5)-B(1)-C(7)    | 109.9(11) | N(3)-Ru(1)-N(5) | 92.8(4)   |
| C(8)-B(1)-C(7)    | 109.3(13) | N(2)-Ru(1)-N(5) | 174.3(5)  |
| C(6)-B(1)-C(7)    | 108.4(13) | N(4)-Ru(1)-N(1) | 94.9(5)   |
| N(1)-C(1)-C(2)    | 123.0(13) | N(3)-Ru(1)-N(1) | 176.0(5)  |
| C(3)-C(2)-C(1)    | 118.9(13) | N(2)-Ru(1)-N(1) | 88.4(4)   |
| C(4)-C(3)-C(2)    | 118.2(13) | N(5)-Ru(1)-N(1) | 88.3(4)   |
| C(3)-C(4)-C(5)    | 123.1(12) | F(1)-C(19)-F(3) | 131(3)    |
| N(1)-C(5)-C(4)    | 117.9(11) | F(1)-C(19)-F(2) | 128(3)    |
| N(1)-C(5)-B(1)    | 111.2(11) | F(3)-C(19)-F(2) | 93(2)     |
| C(4)-C(5)-B(1)    | 130.7(12) | F(1)-C(19)-S(1) | 104(2)    |
| C(9)-C(8)-N(2)    | 116.2(15) | F(3)-C(19)-S(1) | 98(2)     |
| C(9)-C(8)-B(1)    | 130.8(13) | F(2)-C(19)-S(1) | 92(2)     |
| N(2)-C(8)-B(1)    | 112.5(10) | O(2)-S(1)-O(1)  | 104(2)    |
| C(10)-C(9)-C(8)   | 122.0(14) | O(2)-S(1)-O(3)  | 115.2(13) |
| C(11)-C(10)-C(9)  | 119.1(12) | O(1)-S(1)-O(3)  | 109(2)    |
| C(10)-C(11)-C(12) | 116.5(15) | O(2)-S(1)-C(19) | 111.1(16) |
| N(2)-C(12)-C(11)  | 126.5(14) | O(1)-S(1)-C(19) | 105(2)    |
| N(3)-C(13)-C(14)  | 174.5(17) | O(3)-S(1)-C(19) | 111.3(14) |
| N(4)-C(15)-C(16)  | 176.9(18) | F(6)-C(20)-F(4) | 132(4)    |
| N(5)-C(17)-C(18)  | 174.9(18) | F(6)-C(20)-F(5) | 124(3)    |
| C(1)-N(1)-C(5)    | 118.8(11) | F(4)-C(20)-F(5) | 85(2)     |
| C(1)-N(1)-Ru(1)   | 124.2(9)  | F(6)-C(20)-S(2) | 104(3)    |
| C(5)-N(1)-Ru(1)   | 116.9(8)  | F(4)-C(20)-S(2) | 105(2)    |
| C(12)-N(2)-C(8)   | 119.4(11) | F(5)-C(20)-S(2) | 102(3)    |
| C(12)-N(2)-Ru(1)  | 126.0(10) | O(5)-S(2)-O(4)  | 97(2)     |
| C(8)-N(2)-Ru(1)   | 114.6(9)  | O(5)-S(2)-O(6)  | 119.9(17) |
| C(13)-N(3)-Ru(1)  | 172.3(13) | O(4)-S(2)-O(6)  | 105(2)    |
| C(15)-N(4)-Ru(1)  | 177.5(12) | O(5)-S(2)-C(20) | 114(2)    |
| C(17)-N(5)-Ru(1)  | 176.2(14) | O(4)-S(2)-C(20) | 105(2)    |
| N(4)-Ru(1)-N(3)   | 88.8(5)   | O(6)-S(2)-C(20) | 113.0(15) |

**Table S16.** Anisotropic displacement parameters ( $\text{\AA}^2 \times 10^3$ ) for **7**. The anisotropic displacement factor exponent takes the form:  $-2 \pi^2 [ h^2 a^{*2} U^{11} + \dots + 2 h k a^* b^* U^{12} ]$

|       | U <sup>11</sup> | U <sup>22</sup> | U <sup>33</sup> | U <sup>23</sup> | U <sup>13</sup> | U <sup>12</sup> |
|-------|-----------------|-----------------|-----------------|-----------------|-----------------|-----------------|
| B(1)  | 42(9)           | 53(10)          | 47(10)          | 23(8)           | -6(8)           | 4(7)            |
| C(1)  | 34(8)           | 61(10)          | 70(10)          | 30(8)           | -32(8)          | -8(7)           |
| C(2)  | 58(11)          | 47(9)           | 97(12)          | 36(10)          | -23(10)         | -3(8)           |
| C(3)  | 77(12)          | 23(8)           | 79(12)          | -5(8)           | -37(10)         | -7(7)           |
| C(4)  | 59(10)          | 32(8)           | 61(10)          | 2(7)            | -32(8)          | -3(7)           |
| C(5)  | 42(8)           | 26(7)           | 49(8)           | -1(7)           | -19(7)          | 13(6)           |
| C(6)  | 56(10)          | 65(11)          | 62(11)          | 0(9)            | -18(9)          | 16(9)           |
| C(7)  | 74(9)           | 26(8)           | 78(11)          | 6(8)            | -36(9)          | -6(7)           |
| C(8)  | 52(8)           | 23(7)           | 73(10)          | 19(7)           | -44(7)          | -10(6)          |
| C(9)  | 62(10)          | 28(9)           | 83(11)          | 8(8)            | -40(9)          | 2(7)            |
| C(10) | 37(8)           | 41(9)           | 86(12)          | 26(8)           | -35(8)          | -12(6)          |
| C(11) | 38(8)           | 31(8)           | 88(11)          | 22(8)           | 0(8)            | 6(6)            |
| C(12) | 40(8)           | 40(9)           | 59(9)           | 32(7)           | -22(7)          | -17(6)          |
| C(13) | 39(8)           | 34(9)           | 46(9)           | 3(8)            | -17(7)          | 0(7)            |
| C(14) | 60(11)          | 53(10)          | 69(11)          | 12(9)           | -36(9)          | -7(8)           |
| C(15) | 26(8)           | 67(11)          | 84(13)          | 33(11)          | -23(9)          | -7(7)           |
| C(16) | 39(10)          | 190(20)         | 102(15)         | 83(15)          | 4(10)           | 11(12)          |
| C(17) | 60(11)          | 53(11)          | 61(11)          | 25(9)           | -7(9)           | -12(9)          |
| C(18) | 27(9)           | 78(13)          | 190(20)         | 76(13)          | -23(11)         | 2(9)            |
| N(1)  | 31(6)           | 36(7)           | 72(8)           | 20(6)           | -27(6)          | -11(5)          |
| N(2)  | 36(7)           | 21(6)           | 89(9)           | 25(6)           | -15(6)          | 8(5)            |
| N(3)  | 33(7)           | 46(8)           | 64(9)           | 26(7)           | -21(6)          | -16(6)          |
| N(4)  | 47(7)           | 37(7)           | 32(7)           | 14(6)           | -3(6)           | -1(6)           |
| N(5)  | 35(7)           | 34(7)           | 59(8)           | 6(6)            | -10(6)          | 4(5)            |
| Ru(1) | 35(1)           | 38(1)           | 56(1)           | 13(1)           | -21(1)          | -6(1)           |

**Table S17.** Hydrogen coordinates ( $\times 10^4$ ) and isotropic displacement parameters ( $\text{\AA}^2 \times 10^3$ ) for **7**.

|        | x     | y     | z     | U(eq) |
|--------|-------|-------|-------|-------|
| H(1)   | 5714  | 9668  | 7180  | 66    |
| H(2)   | 6989  | 11939 | 7624  | 79    |
| H(3)   | 8191  | 12434 | 9001  | 74    |
| H(4)   | 8201  | 10624 | 9837  | 62    |
| H(6A)  | 7297  | 7243  | 10779 | 92    |
| H(6B)  | 6556  | 8756  | 10790 | 92    |
| H(6C)  | 8455  | 8605  | 10546 | 92    |
| H(7A)  | 4024  | 7724  | 9610  | 91    |
| H(7B)  | 4652  | 6253  | 9838  | 91    |
| H(7C)  | 4483  | 6547  | 8864  | 91    |
| H(9)   | 9902  | 6684  | 9844  | 70    |
| H(10)  | 11319 | 5059  | 8998  | 65    |
| H(11)  | 10213 | 4164  | 7628  | 61    |
| H(12)  | 7633  | 4776  | 7251  | 55    |
| H(14A) | 2940  | 1584  | 7606  | 92    |
| H(14B) | 3672  | 1621  | 6673  | 92    |
| H(14C) | 1838  | 2076  | 6857  | 92    |
| H(16A) | 7211  | 5630  | 4958  | 156   |
| H(16B) | 7758  | 7314  | 5054  | 156   |
| H(16C) | 5905  | 6711  | 4724  | 156   |
| H(18A) | -529  | 8285  | 6931  | 140   |
| H(18B) | 305   | 9724  | 7469  | 140   |
| H(18C) | -572  | 8468  | 7950  | 140   |



**Table S18.** Anisotropic displacement parameters ( $\text{\AA}^2 \times 10^3$ ) for **7**. The anisotropic displacement factor exponent takes the form:  $-2 \pi^2 [ h^2 a^{*2} U^{11} + \dots + 2 h k a^* b^* U^{12} ]$

|       | U <sup>11</sup> | U <sup>22</sup> | U <sup>33</sup> | U <sup>23</sup> | U <sup>13</sup> | U <sup>12</sup> |
|-------|-----------------|-----------------|-----------------|-----------------|-----------------|-----------------|
| B(1)  | 45(8)           | 59(10)          | 32(8)           | 24(7)           | 16(6)           | 14(7)           |
| C(1)  | 36(7)           | 58(9)           | 78(11)          | 23(8)           | -33(7)          | -8(6)           |
| C(2)  | 66(10)          | 45(8)           | 103(14)         | 34(9)           | -40(9)          | -8(7)           |
| C(3)  | 80(11)          | 26(7)           | 97(13)          | 12(8)           | -42(10)         | -8(7)           |
| C(4)  | 55(8)           | 34(7)           | 87(12)          | -1(8)           | -39(8)          | 1(6)            |
| C(5)  | 55(8)           | 27(7)           | 83(11)          | 6(7)            | -29(8)          | 12(6)           |
| C(6)  | 64(9)           | 54(9)           | 76(11)          | 10(8)           | -18(8)          | 15(7)           |
| C(7)  | 78(11)          | 31(7)           | 115(15)         | 11(8)           | -54(11)         | -1(7)           |
| C(8)  | 47(7)           | 33(7)           | 79(11)          | 20(7)           | -49(8)          | -9(5)           |
| C(9)  | 51(8)           | 33(7)           | 90(12)          | 7(8)            | -31(8)          | -2(6)           |
| C(10) | 39(7)           | 48(8)           | 98(12)          | 46(9)           | -30(8)          | -15(6)          |
| C(11) | 44(8)           | 42(8)           | 84(11)          | 23(8)           | -16(8)          | 0(6)            |
| C(12) | 36(7)           | 39(7)           | 72(10)          | 26(7)           | -23(7)          | -14(6)          |
| C(13) | 40(7)           | 41(8)           | 54(9)           | 7(7)            | -17(6)          | 2(6)            |
| C(14) | 63(9)           | 41(8)           | 58(9)           | 11(7)           | -25(7)          | -17(6)          |
| C(15) | 35(8)           | 77(11)          | 82(12)          | 28(10)          | -33(9)          | -7(7)           |
| C(16) | 54(10)          | 180(20)         | 65(12)          | 69(13)          | 1(9)            | 13(11)          |
| C(17) | 50(9)           | 46(8)           | 84(12)          | 23(8)           | -10(8)          | -13(7)          |
| C(18) | 26(7)           | 103(13)         | 159(18)         | 80(13)          | -11(9)          | 1(8)            |
| C(19) | 98(17)          | 200(30)         | 95(18)          | -40(19)         | -51(14)         | 66(19)          |
| F(1)  | 142(12)         | 300(20)         | 102(10)         | -26(11)         | -17(9)          | 149(14)         |
| F(2)  | 93(8)           | 121(9)          | 97(8)           | -13(7)          | -47(7)          | 20(6)           |
| F(3)  | 198(18)         | 106(12)         | 390(30)         | 76(16)          | -16(19)         | 7(11)           |
| N(1)  | 38(6)           | 37(6)           | 67(8)           | 9(6)            | -29(6)          | -2(4)           |
| N(2)  | 27(5)           | 29(5)           | 88(9)           | 33(6)           | -2(6)           | 6(4)            |
| N(3)  | 37(6)           | 39(6)           | 76(9)           | 8(6)            | -24(6)          | -7(5)           |
| N(4)  | 55(7)           | 57(7)           | 27(6)           | 7(6)            | -15(6)          | -1(5)           |
| N(5)  | 28(6)           | 42(6)           | 85(9)           | 10(6)           | -13(6)          | -4(5)           |
| O(1)  | 280(30)         | 183(19)         | 153(17)         | 121(14)         | 8(17)           | 15(17)          |
| O(2)  | 64(7)           | 109(9)          | 87(9)           | 9(7)            | -41(7)          | -1(6)           |
| O(3)  | 96(10)          | 124(11)         | 111(11)         | -68(9)          | -63(9)          | 60(8)           |
| Ru(1) | 39(1)           | 38(1)           | 63(1)           | 14(1)           | -23(1)          | -7(1)           |
| S(1)  | 80(4)           | 286(11)         | 178(8)          | -154(8)         | -77(5)          | 65(6)           |

**Table S19.** Hydrogen coordinates ( $\times 10^4$ ) and isotropic displacement parameters ( $\text{\AA}^2 \times 10^3$ ) for **7**.

|        | x     | y     | z     | U(eq) |
|--------|-------|-------|-------|-------|
| H(1)   | 5726  | 9634  | 7149  | 69    |
| H(2)   | 7009  | 11908 | 7580  | 85    |
| H(3)   | 8208  | 12434 | 8960  | 82    |
| H(4)   | 8192  | 10623 | 9826  | 72    |
| H(6A)  | 7480  | 7275  | 10779 | 96    |
| H(6B)  | 6355  | 8586  | 10805 | 96    |
| H(6C)  | 8281  | 8809  | 10575 | 96    |
| H(7A)  | 3968  | 7625  | 9614  | 91    |
| H(7B)  | 4605  | 6035  | 9633  | 91    |
| H(9)   | 9865  | 6608  | 9835  | 71    |
| H(10)  | 11345 | 5085  | 8967  | 73    |
| H(11)  | 10230 | 4112  | 7597  | 67    |
| H(12)  | 7637  | 4743  | 7212  | 58    |
| H(14A) | 2834  | 1557  | 7554  | 83    |
| H(14B) | 3834  | 1595  | 6690  | 83    |
| H(14C) | 1964  | 2033  | 6726  | 83    |
| H(16A) | 7250  | 5590  | 4956  | 146   |
| H(16B) | 7750  | 7278  | 5018  | 146   |
| H(16C) | 5914  | 6621  | 4689  | 146   |
| H(18A) | -664  | 7882  | 7082  | 137   |
| H(18B) | 291   | 9441  | 7067  | 137   |
| H(18C) | -289  | 8920  | 7953  | 137   |

<sup>1</sup> a) Hodgkins, T. G.; Powell, D. R. *Inorg. Chem.* **1996**, *35*, 2140-2148. b)

<sup>2</sup> Khaskin, E.; Zavalij, P.Y.; Vedernikov, A.N. *J. Am. Chem. Soc.* **2006**, *128*, 13054.

<sup>3</sup> Alger, J. R.; Prestegard, J. H. *J. Magn. Reson.* **1977**, *27*, 137-141.

<sup>4</sup> Derived from the Bloch-McConnell equations, H.M. McConnell, *J. Chem. Phys.* **1958**, *28*, 430.

<sup>5</sup> Bain, A. D.; Cramer, J.A. *J. Magn. Reson.* **1996**, *118 A*, 21. CIFIT is available from Prof. Alex D. Bain, <http://www.chemistry.mcmaster.ca/bain/>.

<sup>6</sup> Error tabulated according to Morse, P. M.; Spencer, M. D.; Wilson, S. R.; Girolami, G. S. *Organometallics* **1994**, *13*, 1646-1655.

<sup>7</sup> Santhana Mariappan, S. V.; Rabenstein, D. L. *J. Magn. Reson.* **1992**, *100*, 183-188.

<sup>8</sup> Sheldrick, G. M. *SHELXTL*, version 6.14; Bruker Analytical X-ray System, Inc.: Madison, WI, **1997**

<sup>9</sup> Blessing, R.H. *Acta Crystallogr.* **1995**, *A51*, 33
